# Supplementary material for: Pyrrole alkaloids from the fruiting bodies of edible mushroom Lentinula edodes
Source: Royal Society of Chemistry journal article supplement (doi:10.1039/d3ra02672h), 2023-01-01

## **Pyrrole Alkaloids from the Fruiting Bodies of the Edible**

### **Mushroom *Lentinula edodes***

Zhen-Zhu Zhao, Fei Zhang, Bao-Yu Ji, Ning Zhou, Hui Chen, Yan-Jun Sun, Wei-Sheng Feng\*,  
Xiao-Ke Zheng\*

*School of Pharmacy, Henan University of Chinese Medicine, Zhengzhou 450046, China*

#### **Corresponding Authors**

fwsh@hactcm.edu.cn (W.-S. Feng); zhengxk.2006@163.com (X.-K. Zheng)

## Contents

|                                                                                                 |    |
|-------------------------------------------------------------------------------------------------|----|
| 1. Spectroscopic data.....                                                                      | 3  |
| Figure S1. <sup>1</sup> H NMR spectrum of <b>1</b> (600 MHz, CD <sub>3</sub> OD).....           | 3  |
| Figure S2. <sup>13</sup> C and DEPT NMR spectra of <b>1</b> (150 MHz, CD <sub>3</sub> OD).....  | 3  |
| Figure S3. HMBC spectrum of <b>1</b> .....                                                      | 4  |
| Figure S4. HRESIMS report of <b>1</b> .....                                                     | 5  |
| Figure S5. IR report of <b>1</b> .....                                                          | 6  |
| Figure S6. <sup>1</sup> H NMR spectrum of <b>2</b> (600 MHz, CD <sub>3</sub> OD) .....          | 7  |
| Figure S7. <sup>13</sup> C and DEPT NMR spectra of <b>2</b> (150 MHz, CD <sub>3</sub> OD).....  | 7  |
| Figure S8. HSQC spectrum of <b>2</b> .....                                                      | 8  |
| Figure S9. HMBC spectrum of <b>2</b> .....                                                      | 8  |
| Figure S10. HRESIMS report of <b>2</b> .....                                                    | 9  |
| Figure S11. IR report of <b>2</b> .....                                                         | 10 |
| Figure S12. <sup>1</sup> H NMR spectrum of <b>3</b> (600 MHz, CD <sub>3</sub> OD) .....         | 11 |
| Figure S13. <sup>13</sup> C and DEPT NMR spectra of <b>3</b> (150 MHz, CD <sub>3</sub> OD)..... | 11 |
| Figure S14. HSQC spectrum of <b>3</b> .....                                                     | 12 |
| Figure S15. HMBC spectrum of <b>3</b> .....                                                     | 12 |
| Figure S16. HRESIMS report of <b>3</b> .....                                                    | 13 |
| Figure S17. IR report of <b>3</b> .....                                                         | 14 |
| Figure S18. <sup>1</sup> H NMR spectrum of <b>4</b> (600 MHz, CD <sub>3</sub> OD) .....         | 15 |
| Figure S19. <sup>13</sup> C and DEPT NMR spectra of <b>4</b> (150 MHz, CD <sub>3</sub> OD)..... | 15 |
| Figure S20. HSQC spectrum of <b>4</b> .....                                                     | 16 |
| Figure S21. <sup>1</sup> H- <sup>1</sup> H COSY spectrum of <b>4</b> .....                      | 16 |
| Figure S22. HMBC spectrum of <b>4</b> .....                                                     | 17 |
| Figure S23. HRESIMS report of <b>4</b> .....                                                    | 18 |
| Figure S24. IR report of <b>4</b> .....                                                         | 19 |
| Figure S25. <sup>1</sup> H NMR spectrum of <b>5</b> (600 MHz, CD <sub>3</sub> OD) .....         | 20 |
| Figure S26. <sup>13</sup> C and DEPT NMR spectra of <b>5</b> (150 MHz, CD <sub>3</sub> OD)..... | 20 |
| Figure S27. <sup>1</sup> H NMR spectrum of <b>6</b> (600 MHz, CD <sub>3</sub> OD) .....         | 21 |
| Figure S28. <sup>13</sup> C and DEPT NMR spectra of <b>6</b> (150 MHz, CD <sub>3</sub> OD)..... | 21 |
| Figure S29. <sup>1</sup> H NMR spectrum of <b>7</b> (600 MHz, CD <sub>3</sub> OD).....          | 22 |
| Figure S30. <sup>13</sup> C and DEPT NMR spectra of <b>7</b> (150 MHz, CD <sub>3</sub> OD)..... | 22 |
| Figure S31. <sup>1</sup> H NMR spectrum of <b>8</b> (600 MHz, CD <sub>3</sub> OD).....          | 23 |
| Figure S32. <sup>13</sup> C and DEPT NMR spectra of <b>8</b> (150 MHz, CD <sub>3</sub> OD)..... | 23 |
| Figure S33. HSQC spectrum of <b>8</b> .....                                                     | 24 |
| Figure S34. HMBC spectrum of <b>8</b> .....                                                     | 24 |
| Figure S35. <sup>1</sup> H NMR spectrum of <b>9</b> (600 MHz, CD <sub>3</sub> OD).....          | 25 |
| Figure S36. <sup>13</sup> C and DEPT NMR spectra of <b>9</b> (150 MHz, CD <sub>3</sub> OD)..... | 25 |
| Figure S37. HSQC spectrum of <b>9</b> .....                                                     | 26 |
| Figure S38. HMBC spectrum of <b>9</b> .....                                                     | 26 |

## 1. Spectroscopic data

Figure S1. <sup>1</sup>H NMR spectrum of 1 (600 MHz, CD<sub>3</sub>OD)

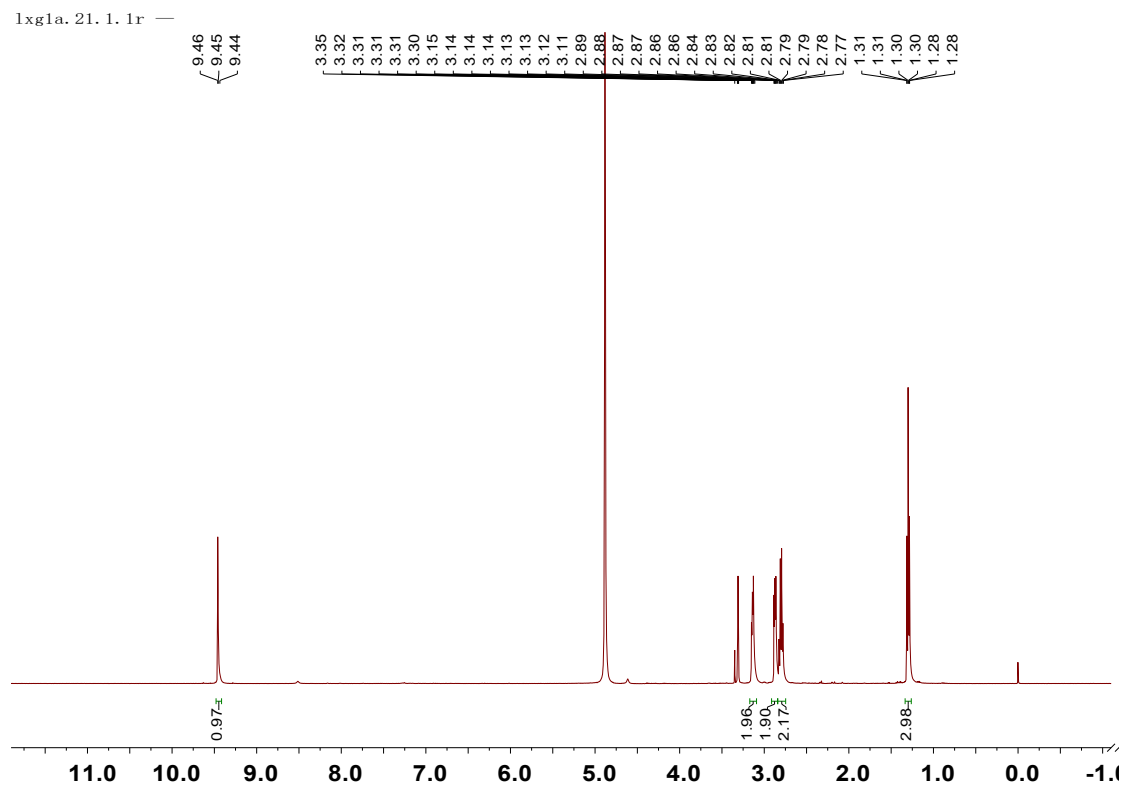

Figure S2. <sup>13</sup>C and DEPT NMR spectra of 1 (150 MHz, CD<sub>3</sub>OD)

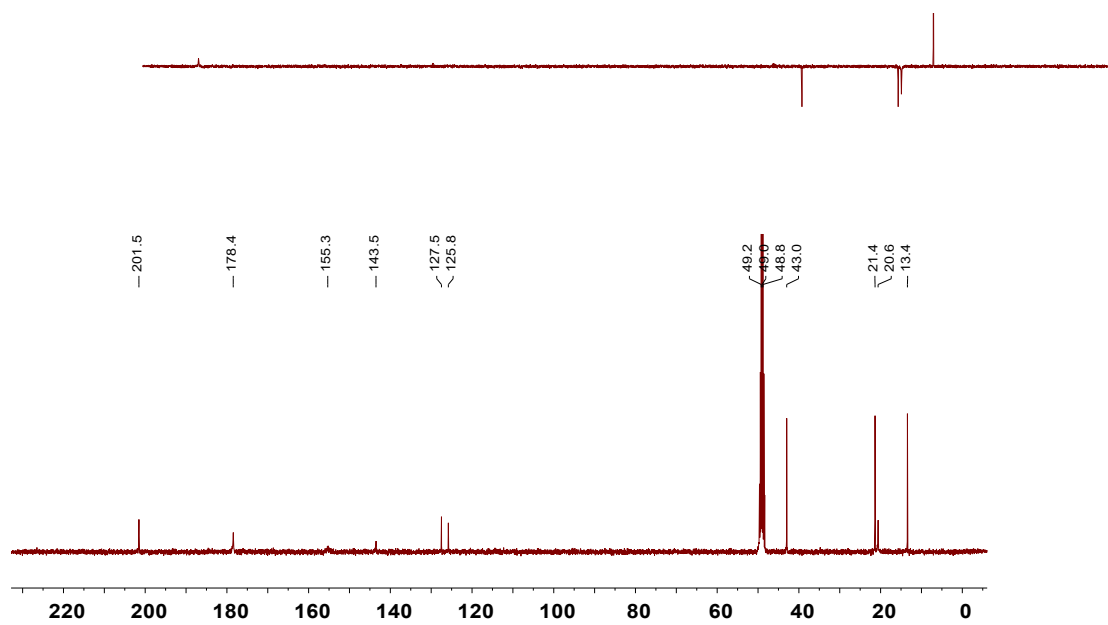

Figure S3. HMBC spectrum of 1

1xg1a.27.1.2rr — 1xg1a hmhc

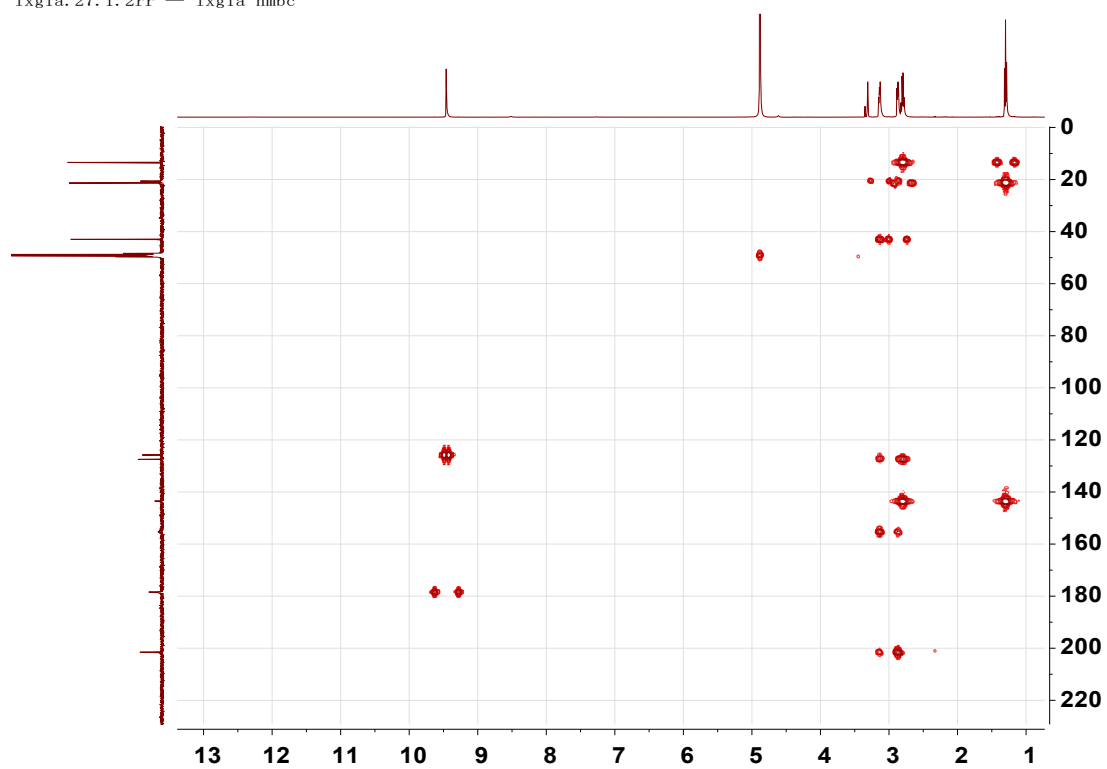

Figure S4. HRESIMS report of 1

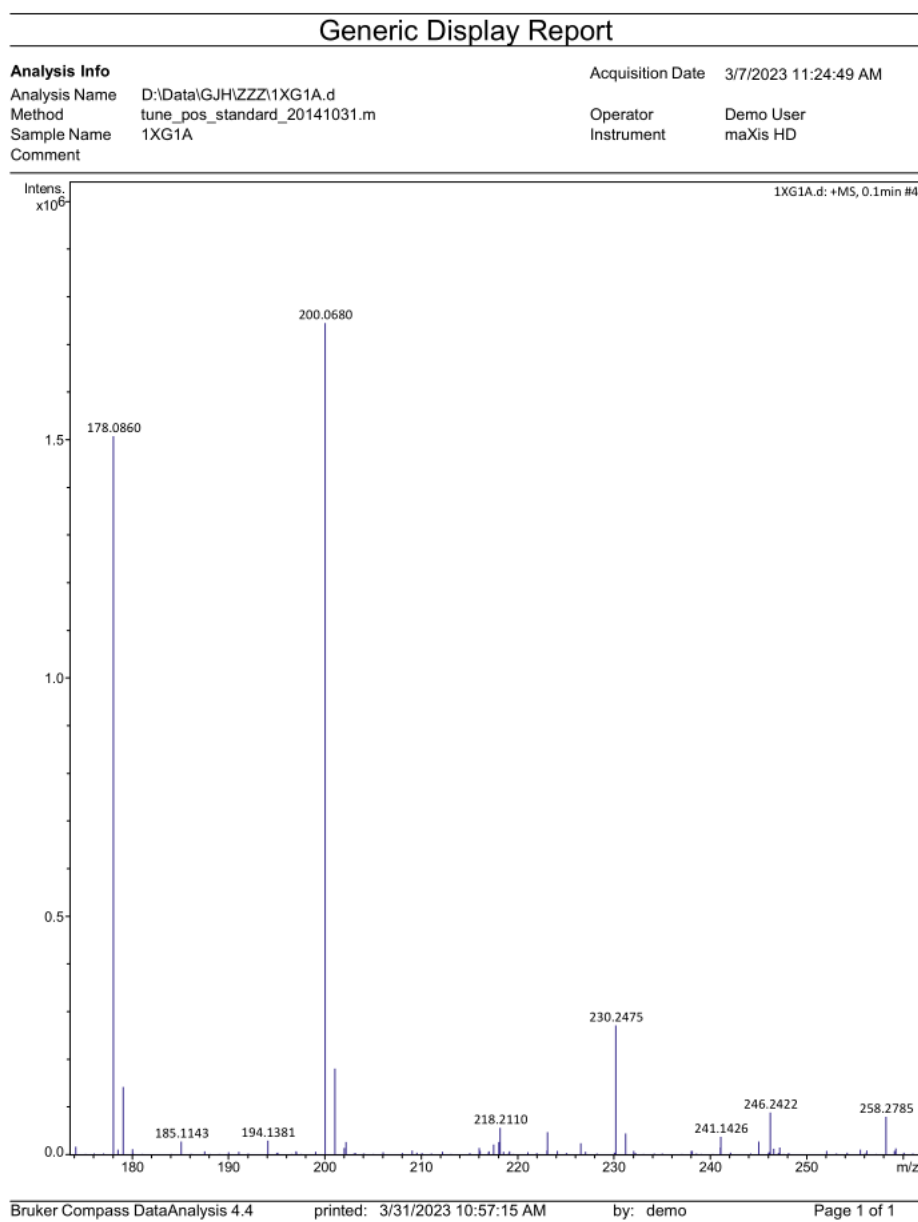

Figure S5. IR report of 1

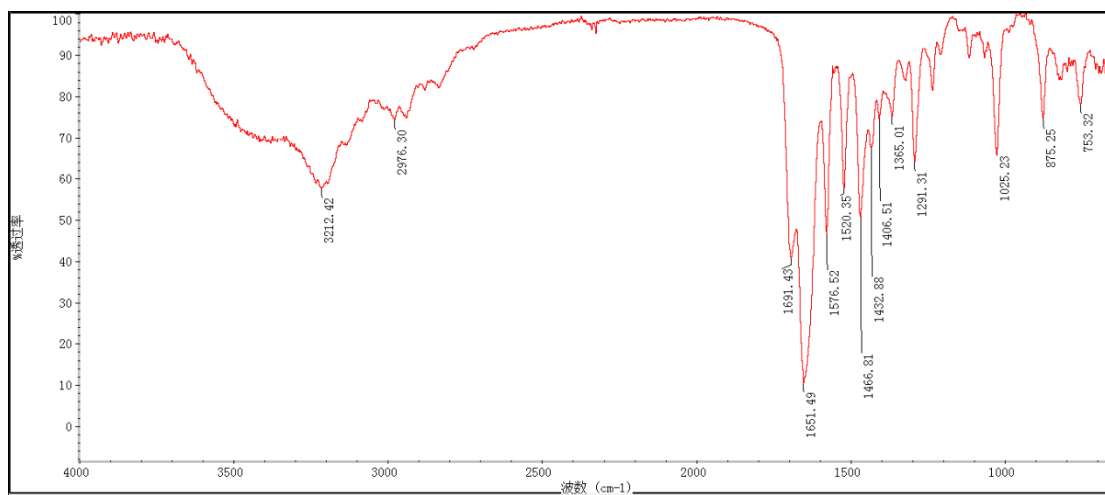

Figure S6.  $^1\text{H}$  NMR spectrum of **2** (600 MHz,  $\text{CD}_3\text{OD}$ )

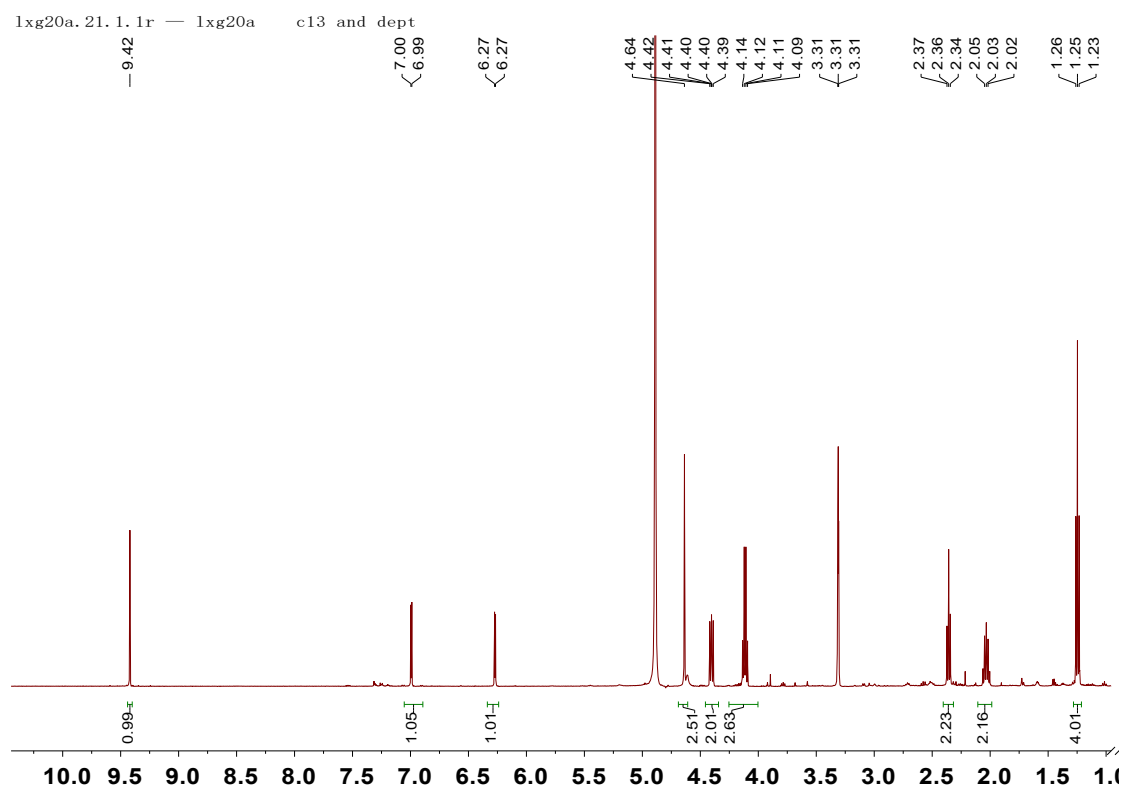

Figure S7.  $^{13}\text{C}$  and DEPT NMR spectra of **2** (150 MHz,  $\text{CD}_3\text{OD}$ )

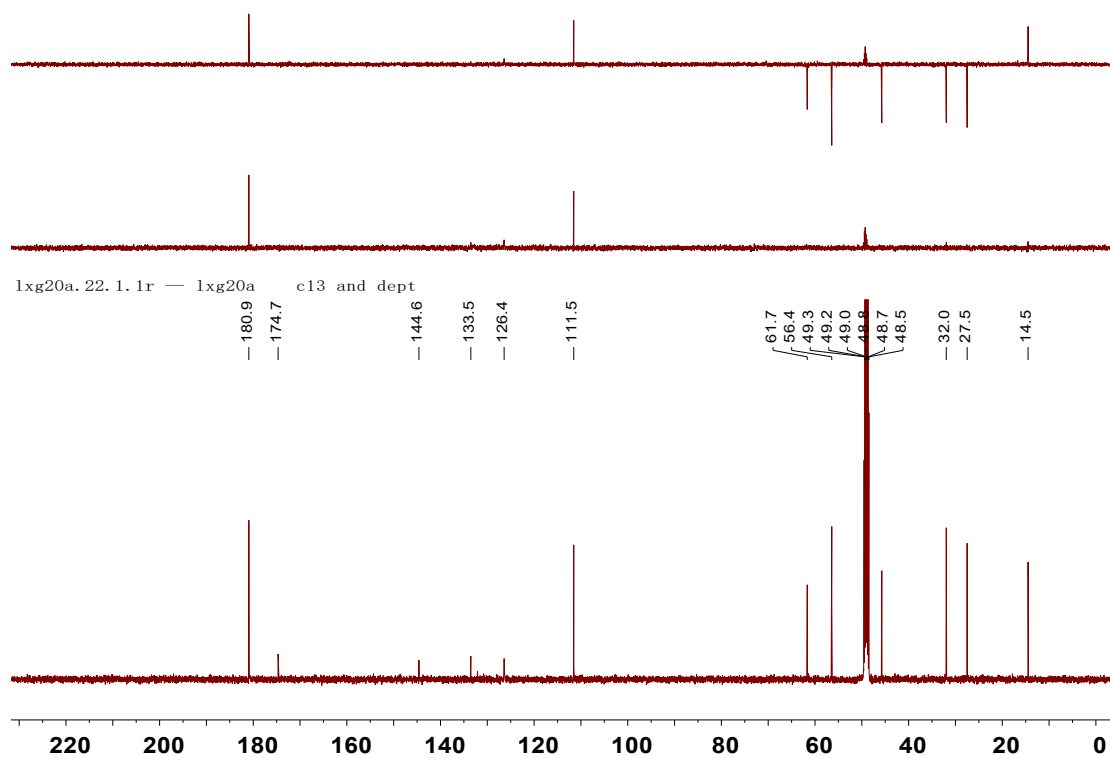

Figure S8. HSQC spectrum of 2

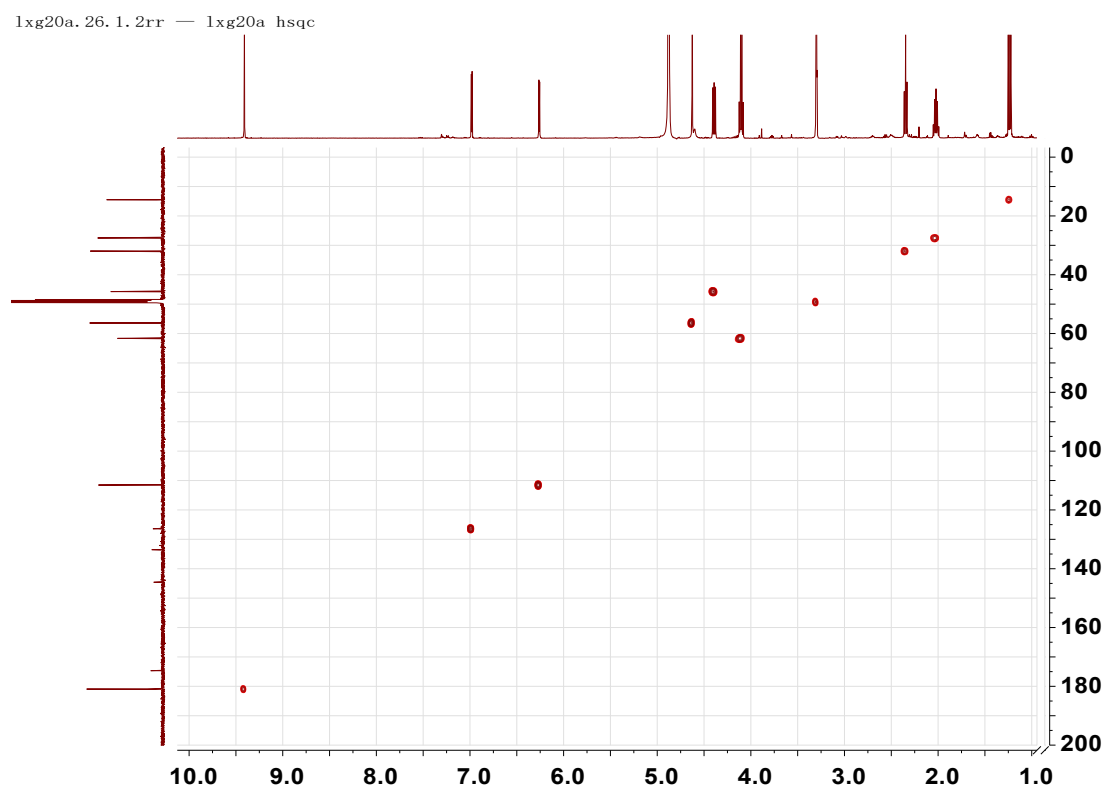

Figure S9. HMBC spectrum of 2

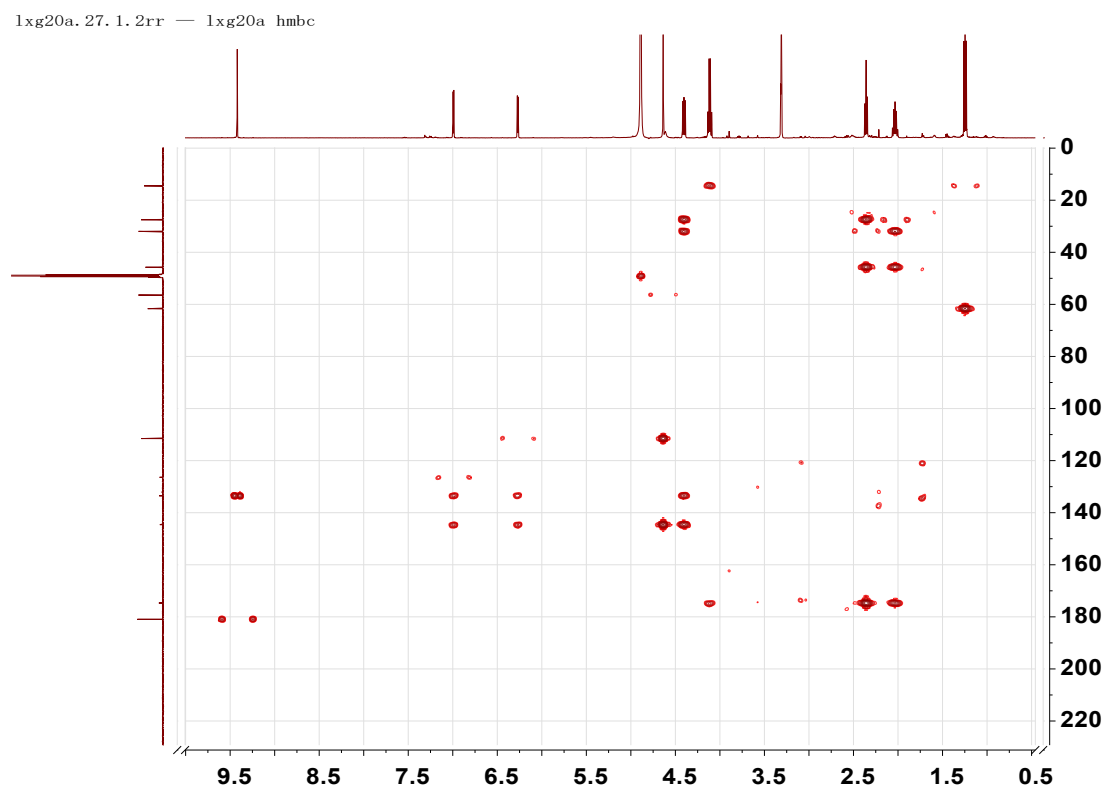



Figure S10. HRESIMS report of 2

### Qualitative Analysis Report

|                               |              |                      |                      |
|-------------------------------|--------------|----------------------|----------------------|
| <b>Data Filename</b>          | lxg20a.d     | <b>Sample Name</b>   | lxg20a               |
| <b>Sample Type</b>            | Sample       | <b>Position</b>      | P1-A4                |
| <b>Instrument Name</b>        | Instrument 1 | <b>User Name</b>     |                      |
| <b>Acq Method</b>             | s.m          | <b>Acquired Time</b> | 4/13/2018 2:13:55 PM |
| <b>IRM Calibration Status</b> | Success      | <b>DA Method</b>     | Default.m            |
| <b>Comment</b>                |              |                      |                      |

**Sample Group** Info.  
**Acquisition SW** 6200 series TOF/6500 series  
**Version** Q-TOF B.05.01 (B5125.2)

#### User Spectra

**Fragmentor Voltage** 135      **Collision Energy** 0      **Ionization Mode** ESI

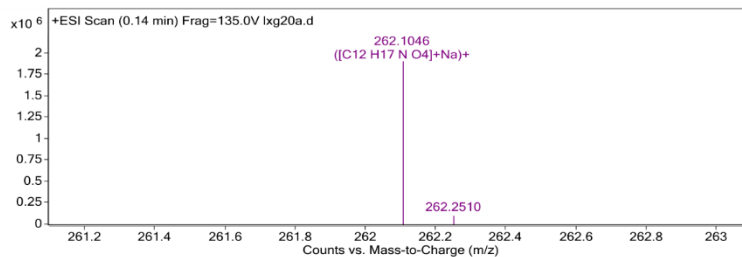

#### Peak List

| m/z      | z | Abund      | Formula      | Ion     |
|----------|---|------------|--------------|---------|
| 102.1269 | 1 | 513321.69  |              |         |
| 200.1268 | 1 | 393223.44  |              |         |
| 222.111  | 1 | 1169930.88 |              |         |
| 262.1046 | 1 | 1912241.25 | C12 H17 N O4 | (M+Na)+ |
| 278.0785 | 1 | 541678.94  |              |         |
| 461.2267 | 1 | 366489.53  |              |         |
| 501.2225 | 1 | 1421629.38 |              |         |
| 502.2253 | 1 | 391769.81  |              |         |

#### Formula Calculator Element Limits

| Element | Min | Max |
|---------|-----|-----|
| C       | 3   | 60  |
| H       | 0   | 120 |
| O       | 0   | 30  |
| N       | 0   | 3   |

#### Formula Calculator Results

| Formula      | CalculatedMass | CalculatedMz | Mz       | Diff. (mDa) | Diff. (ppm) | DBE    |
|--------------|----------------|--------------|----------|-------------|-------------|--------|
| C12 H17 N O4 | 239.1158       | 262.1050     | 262.1046 | 0.40        | 1.53        | 5.0000 |

--- End Of Report ---

Figure S11. IR report of 2

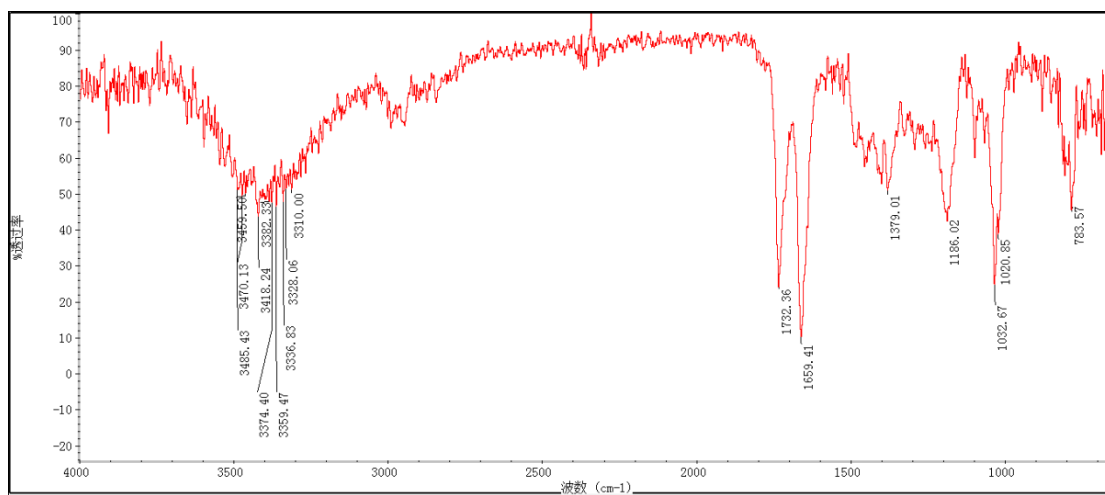

Figure S12. <sup>1</sup>H NMR spectrum of 3 (600 MHz, CD<sub>3</sub>OD)

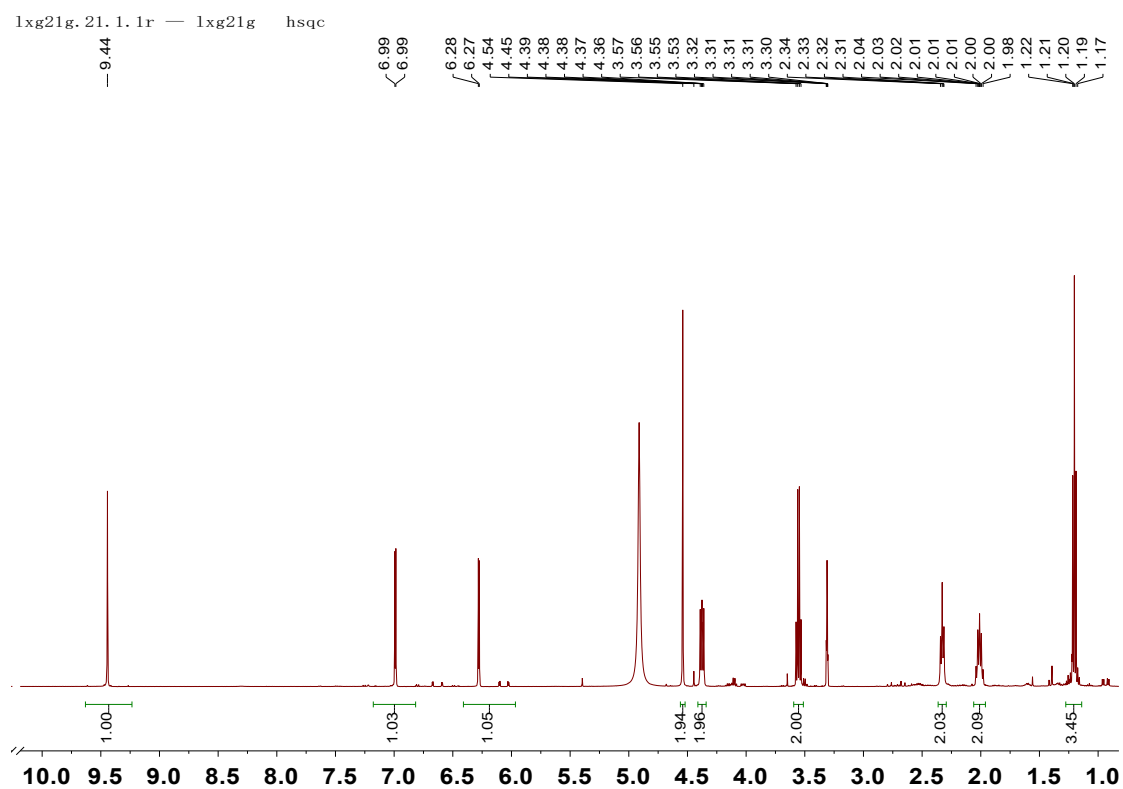

Figure S13. <sup>13</sup>C and DEPT NMR spectra of 3 (150 MHz, CD<sub>3</sub>OD)

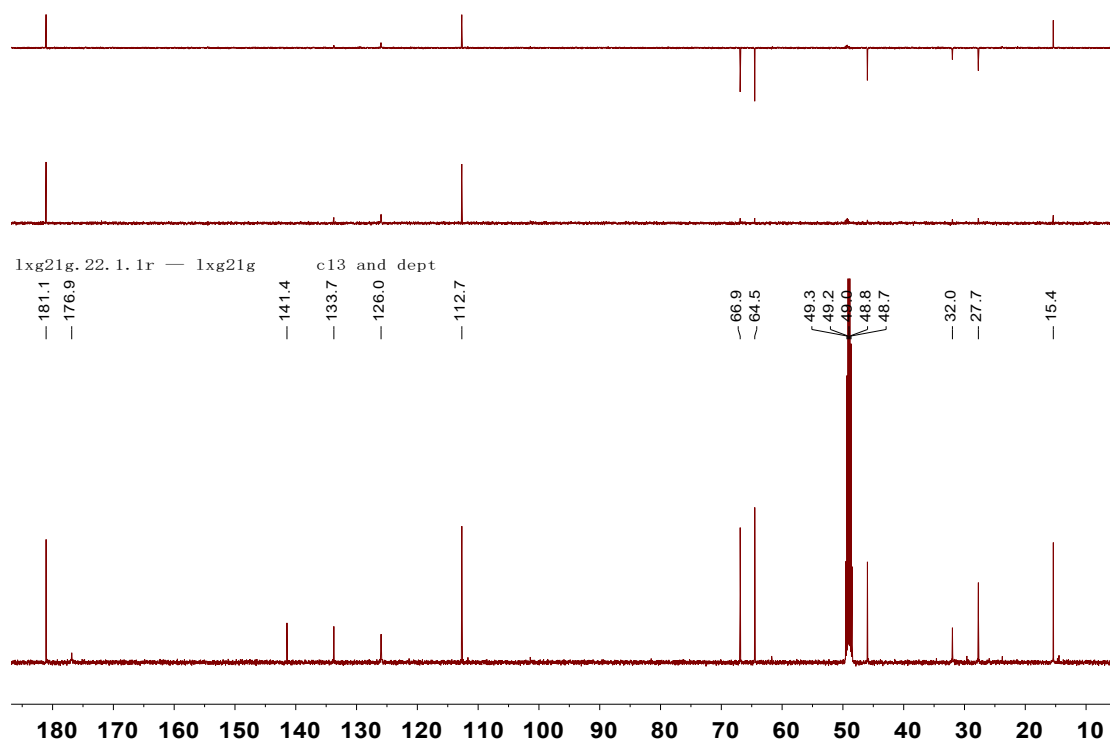

Figure S14. HSQC spectrum of 3

1xg21g.26.1.2rr — 1xg21g hsqc

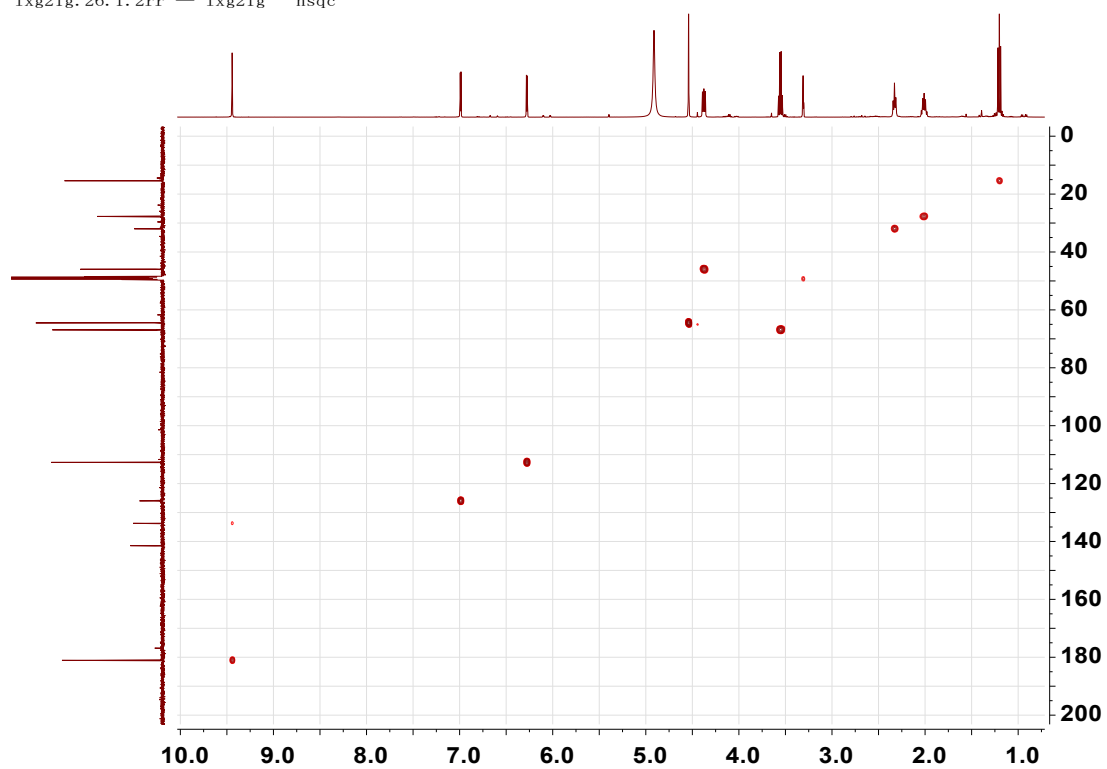

Figure S15. HMBC spectrum of 3

1xg21g.27.1.2rr — 1xg21g hmbc

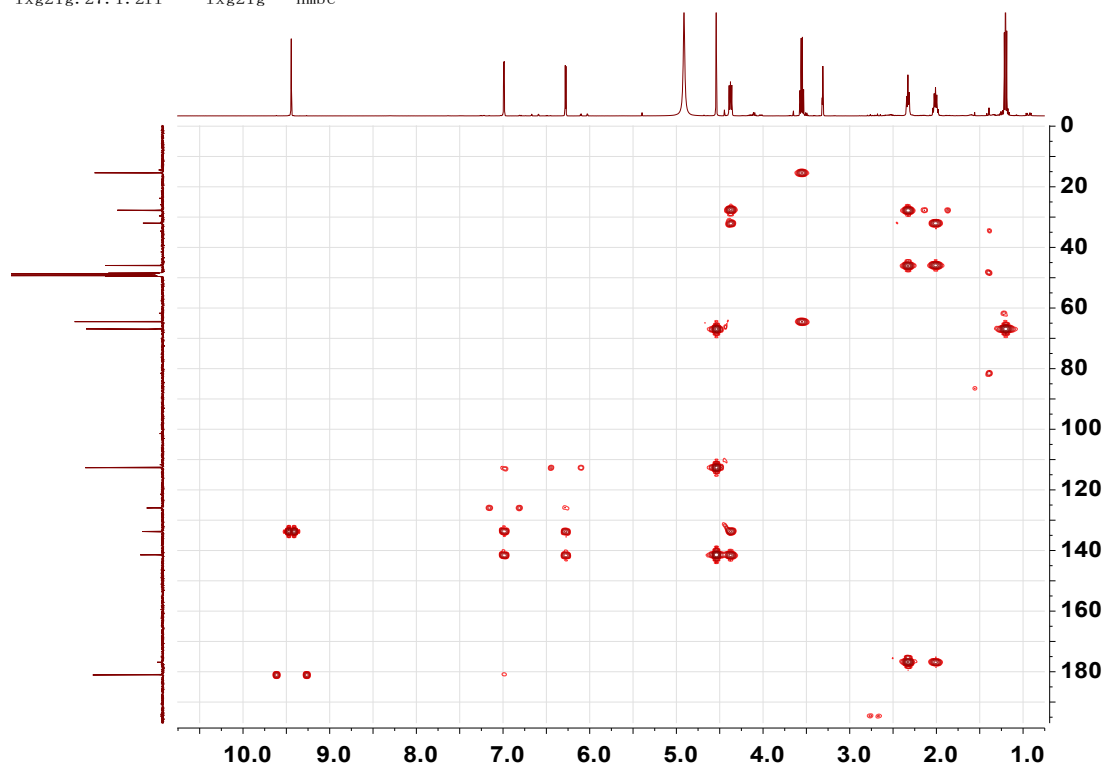

Figure S16. HRESIMS report of 3

### Qualitative Analysis Report

**Data Filename** lkg21g.d      **Sample Name** lkg21g  
**Sample Type** Sample      **Position** P1-A5  
**Instrument Name** Instrument 1      **User Name**  
**Acq Method** s.m      **Acquired Time** 5/3/2018 10:10:32 AM  
**IRM Calibration Status** Success      **DA Method** Default.m  
**Comment**

**Sample Group**      **Info.**  
**Acquisition SW** 6200 series TOF/6500 series  
**Version** Q-TOF B.05.01 (B5125.2)

#### User Spectra

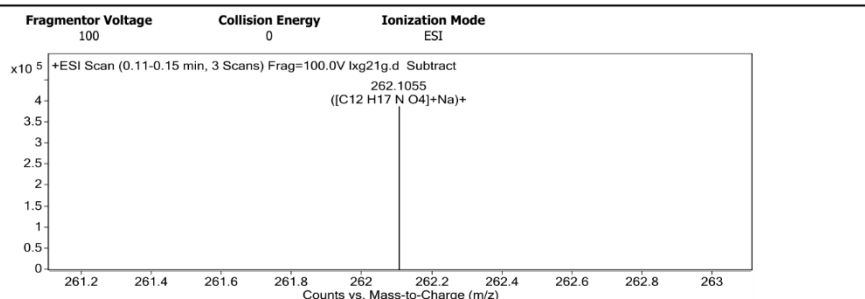

#### Peak List

| m/z      | z | Abund     | Formula      | Ion     |
|----------|---|-----------|--------------|---------|
| 194.081  | 1 | 35750.83  |              |         |
| 262.1055 | 1 | 389479.88 | C12 H17 N O4 | (M+Na)+ |
| 263.1085 | 1 | 49929     | C12 H17 N O4 | (M+Na)+ |
| 278.0791 | 1 | 127673.75 |              |         |
| 501.2211 | 1 | 110860.15 |              |         |
| 502.2235 | 1 | 29897.03  |              |         |
| 523.2029 | 1 | 27776.94  |              |         |
| 540.2571 | 1 | 29902.53  |              |         |

#### Formula Calculator Element Limits

| Element | Min | Max |
|---------|-----|-----|
| C       | 3   | 60  |
| H       | 0   | 120 |
| O       | 0   | 30  |
| N       | 0   | 3   |

#### Formula Calculator Results

| Formula      | CalculatedMass | CalculatedMz | Mz       | Diff. (mDa) | Diff. (ppm) | DBE    |
|--------------|----------------|--------------|----------|-------------|-------------|--------|
| C12 H17 N O4 | 239.1158       | 262.1050     | 262.1055 | -0.50       | -1.91       | 5.0000 |

--- End Of Report ---

Figure S17. IR report of 3

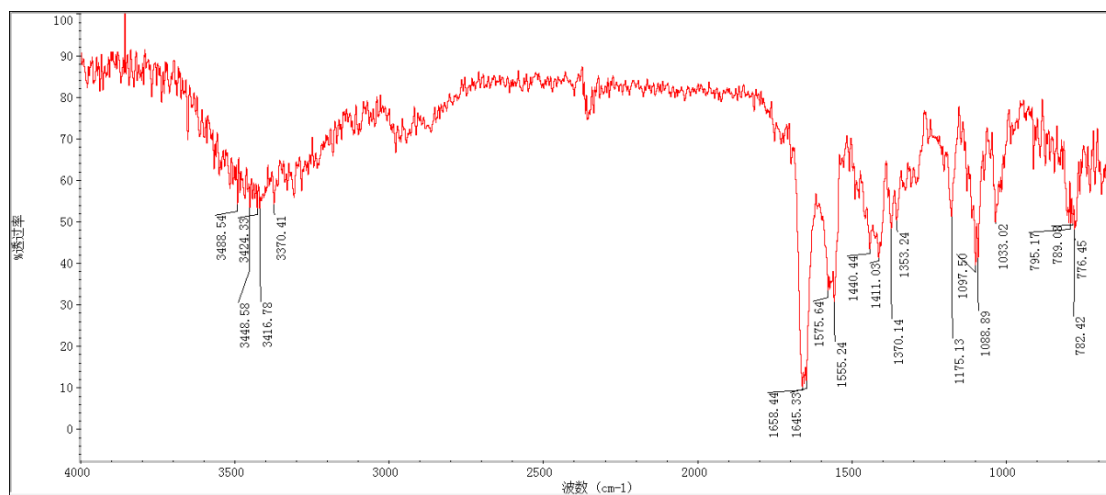

Figure S18. <sup>1</sup>H NMR spectrum of 4 (600 MHz, CD<sub>3</sub>OD)

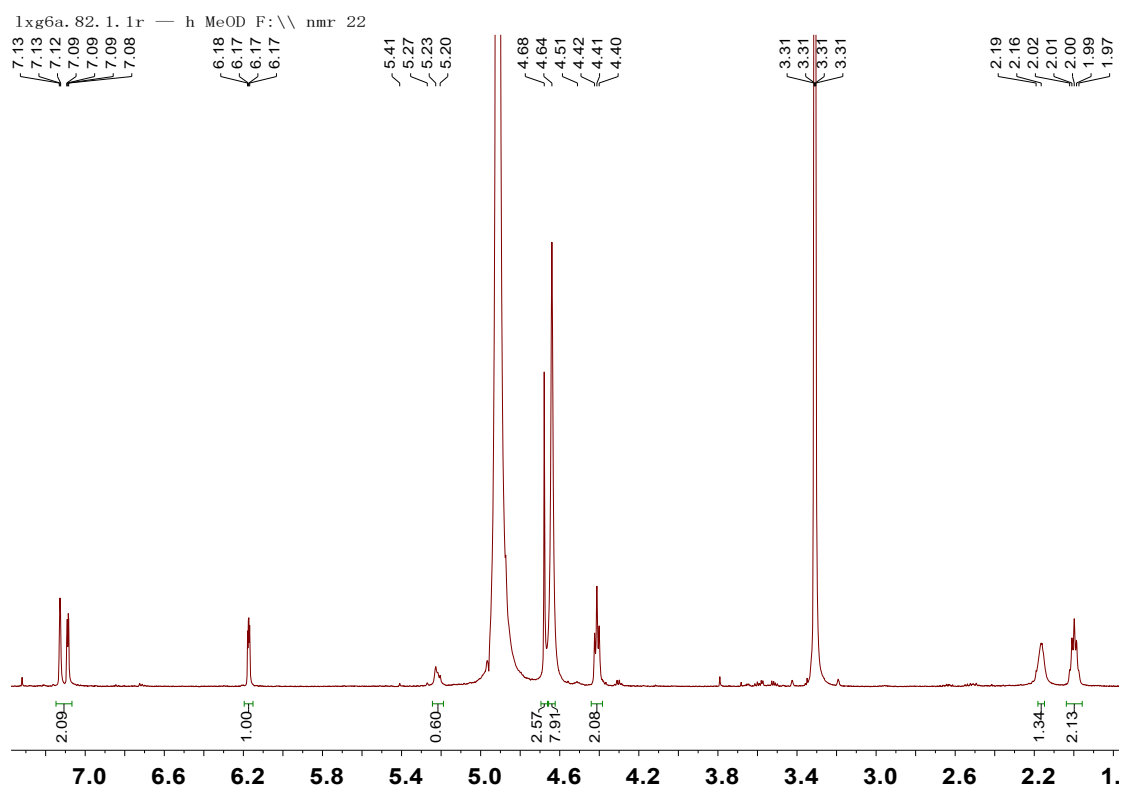

Figure S19. <sup>13</sup>C and DEPT NMR spectra of 4 (150 MHz, CD<sub>3</sub>OD)

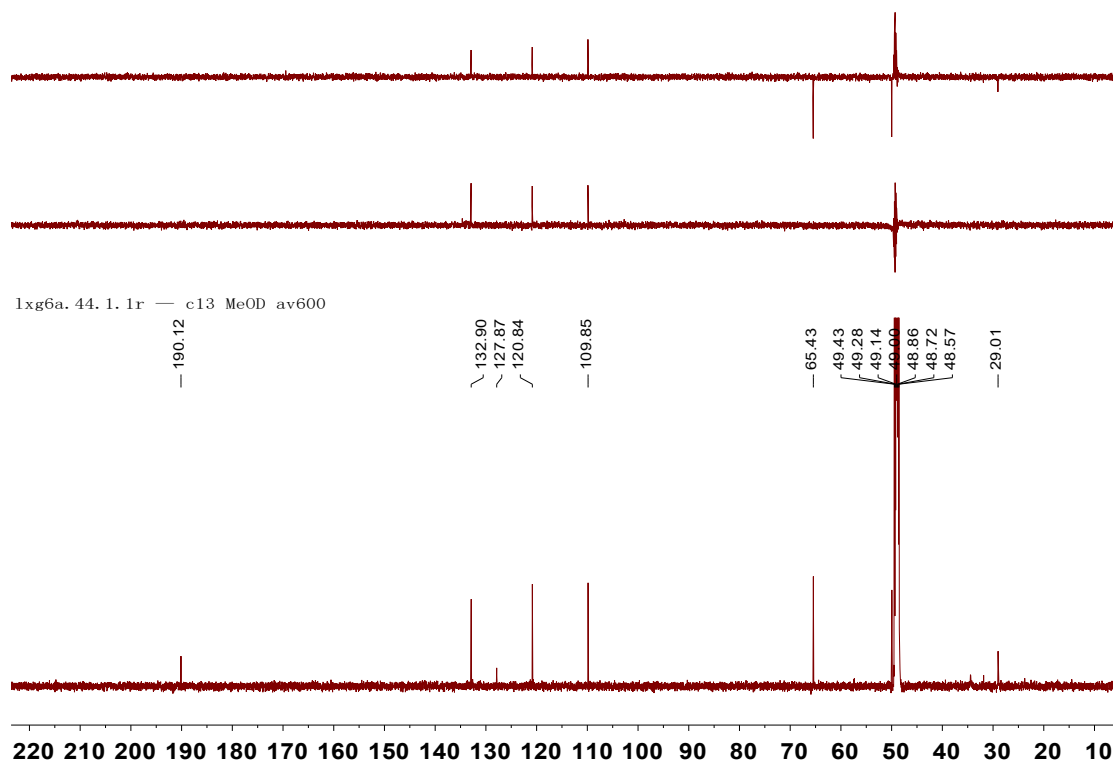

**Figure S20. HSQC spectrum of 4**

1xg6a. 84. 1. 2rr — hsqc MeOD av600

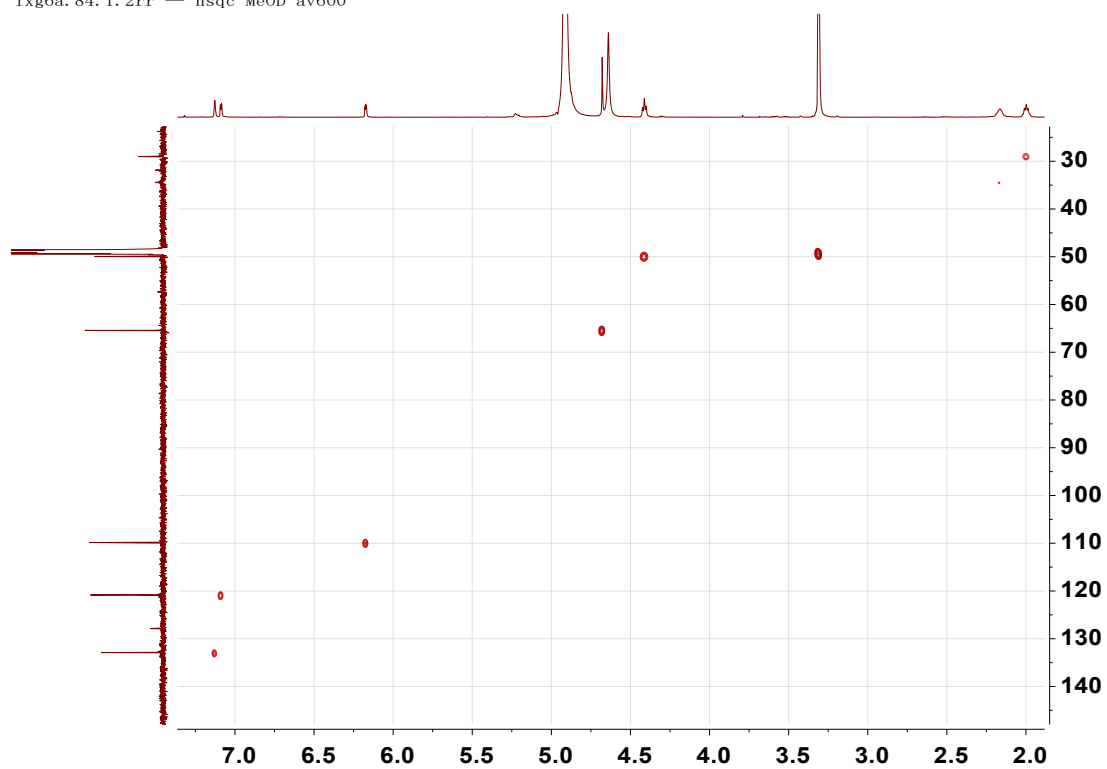

**Figure S21.  $^1\text{H}$ - $^1\text{H}$  COSY spectrum of 4**

1xg6a. 86. 1. 2rr — cosy MeOD av600

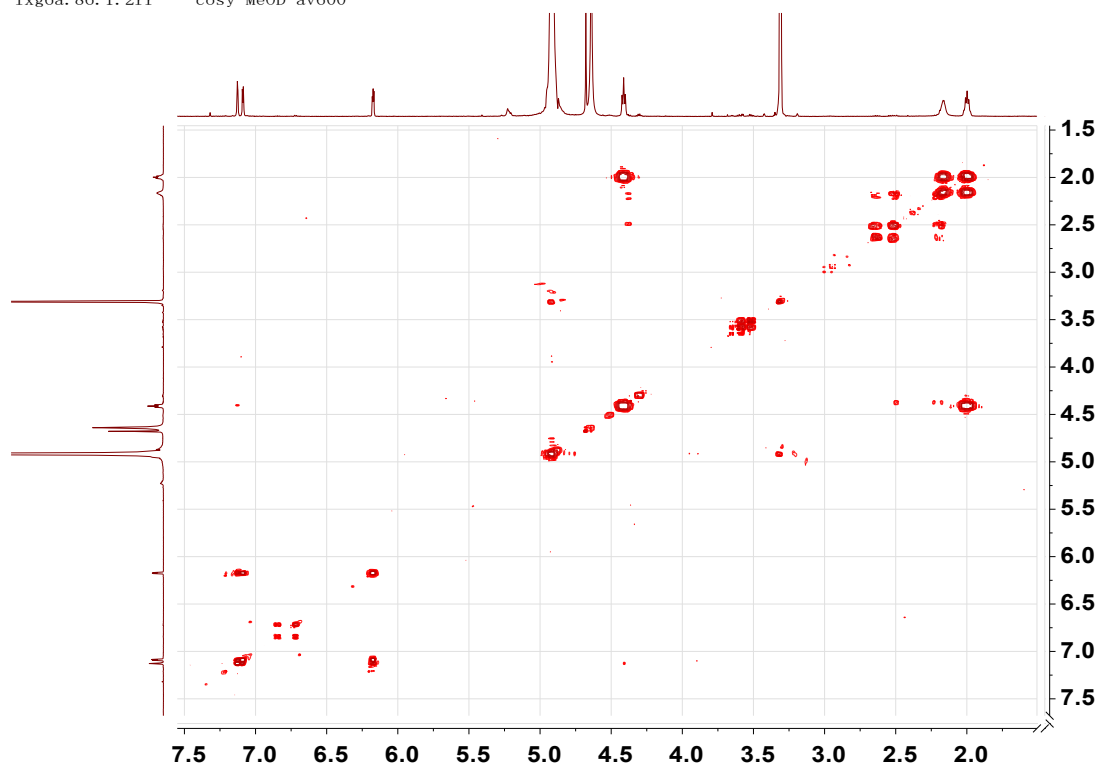



Figure S22. HMBC spectrum of 4

1xg6a.83.1.2rr — hmbc MeOD av600

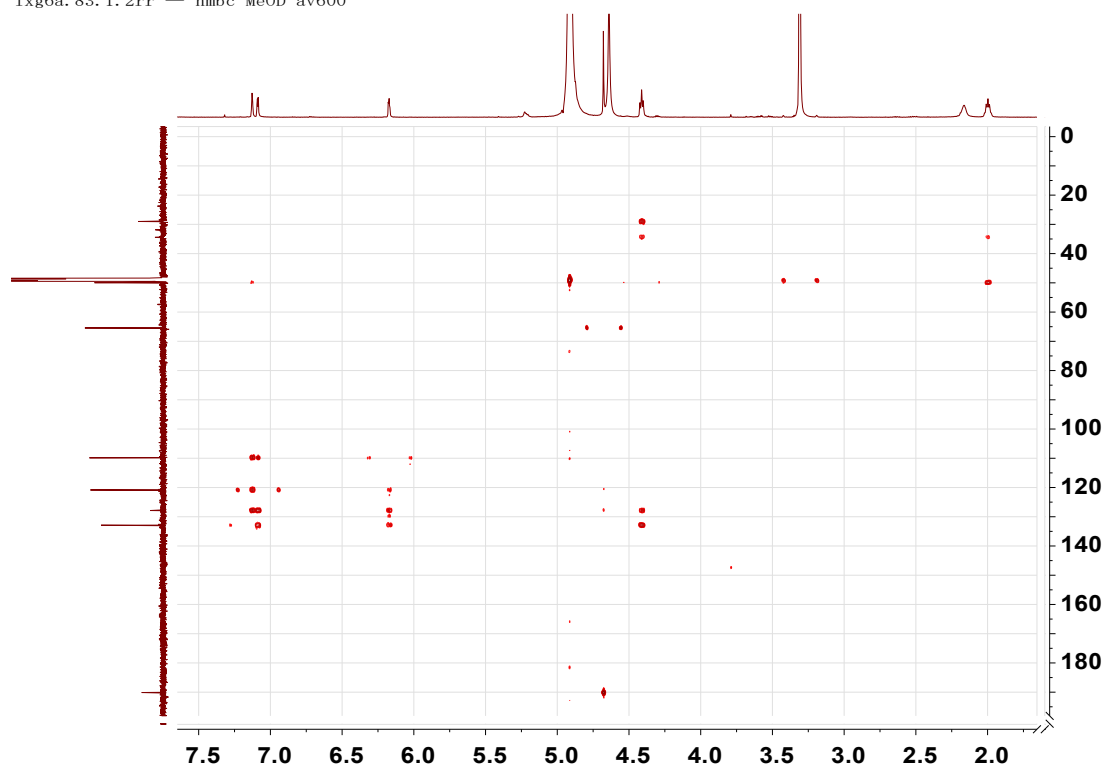

# Figure S23. HRESIMS report of 4

Formula Predictor Report - lxg6a.lcd

Page 1 of 1

Data File: E:\DATA\2018\0128\lxg6a.lcd

| Elmt | Val. | Min | Max | Elmt | Val. | Min | Max | Elmt | Val. | Min | Max | Elmt | Val. | Min | Max | Use Adduct |
|------|------|-----|-----|------|------|-----|-----|------|------|-----|-----|------|------|-----|-----|------------|
| H    | 1    | 0   | 100 | O    | 2    | 0   | 50  | Si   | 4    | 0   | 0   | Br   | 1    | 0   | 0   | Na         |
| C    | 4    | 0   | 100 | F    | 1    | 0   | 0   | S    | 2    | 0   | 0   | I    | 3    | 0   | 0   |            |
| N    | 3    | 0   | 10  | Na   | 1    | 0   | 0   | Cl   | 1    | 0   | 0   |      |      |     |     |            |

Error Margin (ppm): 5  
 HC Ratio: unlimited  
 Max Isotopes: all  
 MSn Iso RI (%): 75.00

DBE Range: -2.0 - 100.0  
 Apply N Rule: yes  
 Isotope RI (%): 1.00  
 MSn Logic Mode: AND

Electron Ions: both  
 Use MSn Info: yes  
 Isotope Res: 10000  
 Max Results: 10

Event#: 1 MS(E+) Ret. Time : 0.507 Scan# : 77

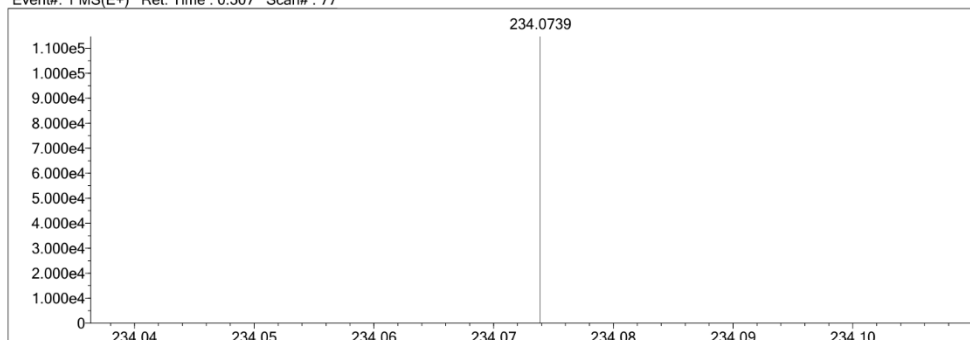

Measured region for 234.0739 m/z

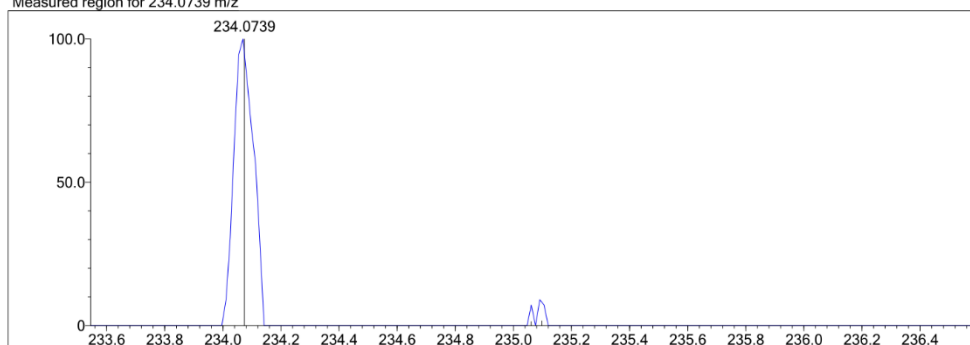

C10 H13 N O4 [M+Na]+ : Predicted region for 234.0737 m/z

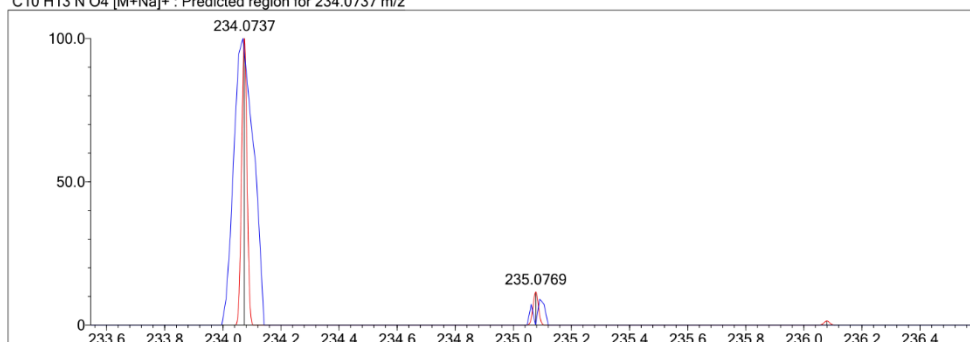

| Formula (M)  | Ion     | Meas. m/z | Pred. m/z | Df. (mDa) | Df. (ppm) | DBE |
|--------------|---------|-----------|-----------|-----------|-----------|-----|
| C10 H13 N O4 | [M+Na]+ | 234.0739  | 234.0737  | 0.2       | 0.85      | 5.0 |

Figure S24. IR report of 4

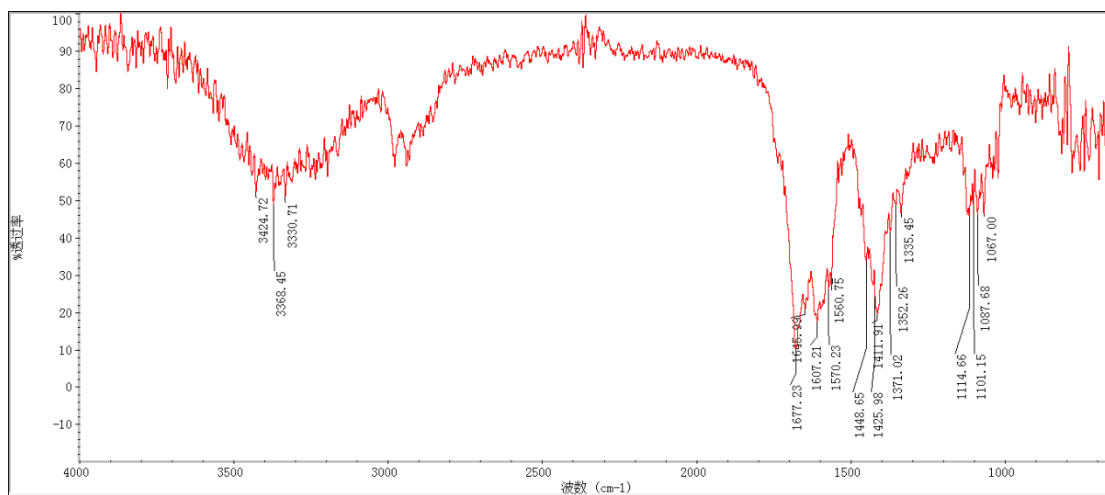

Figure S25. <sup>1</sup>H NMR spectrum of 5 (600 MHz, CD<sub>3</sub>OD)

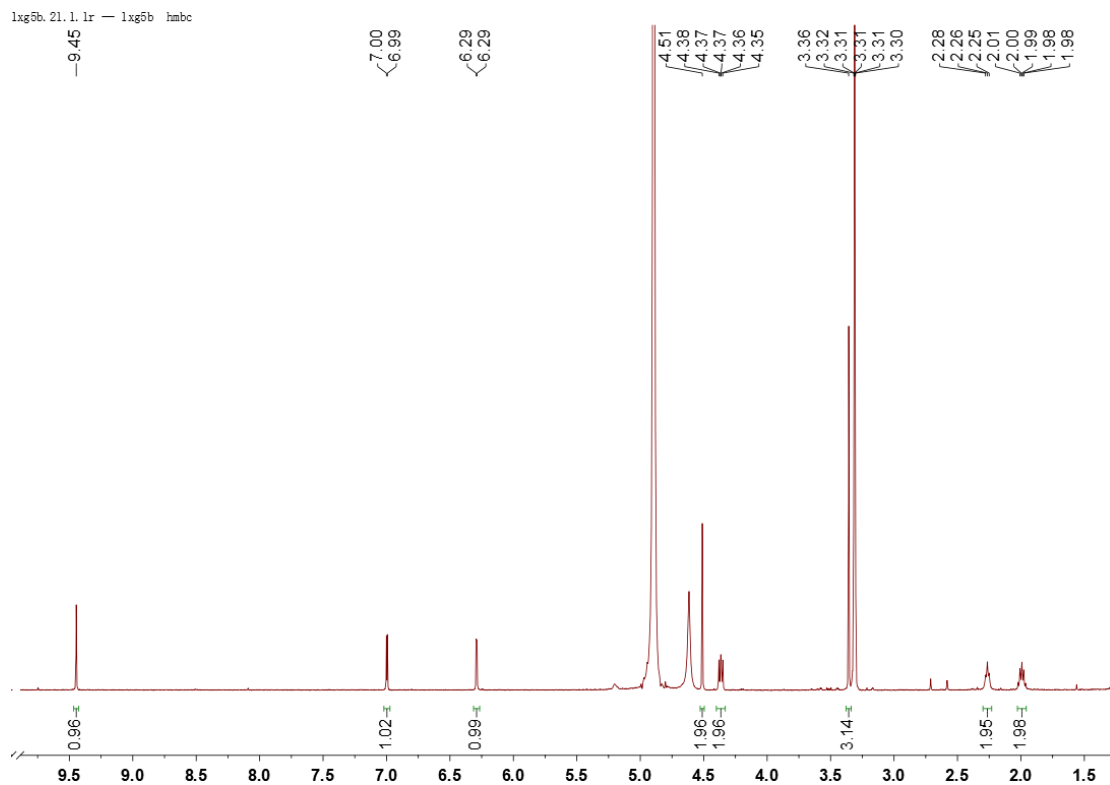

Figure S26. <sup>13</sup>C and DEPT NMR spectra of 5 (150 MHz, CD<sub>3</sub>OD)

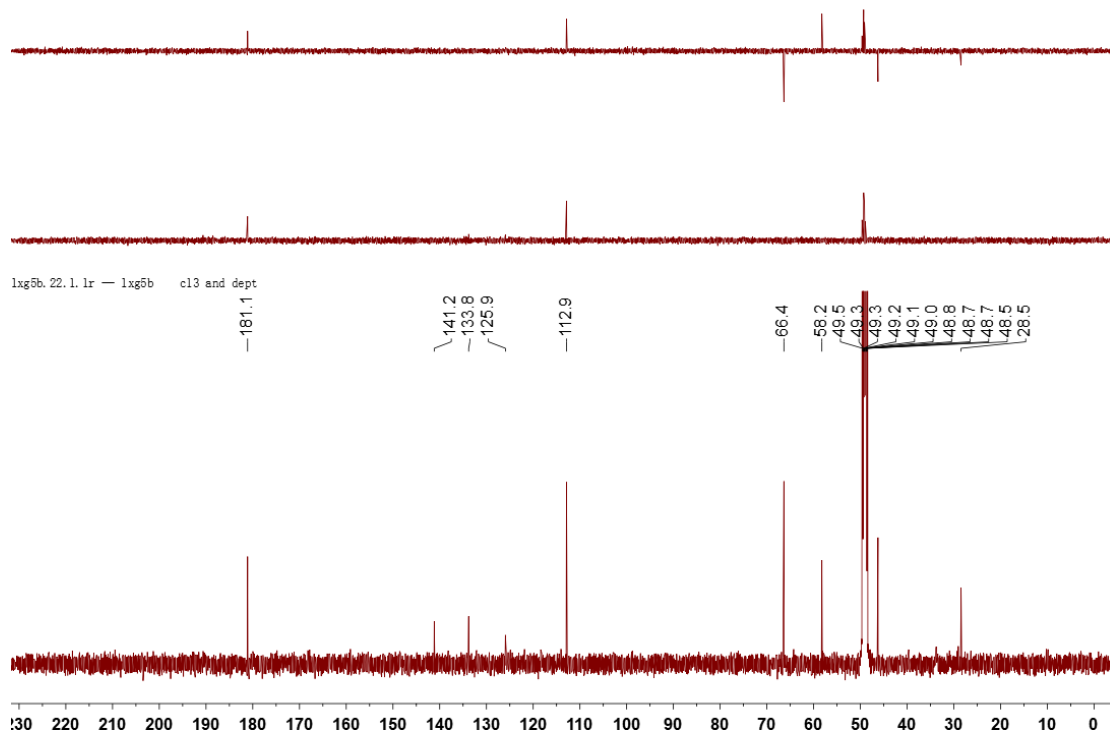

Figure S27. <sup>1</sup>H NMR spectrum of 6 (600 MHz, CD<sub>3</sub>OD)

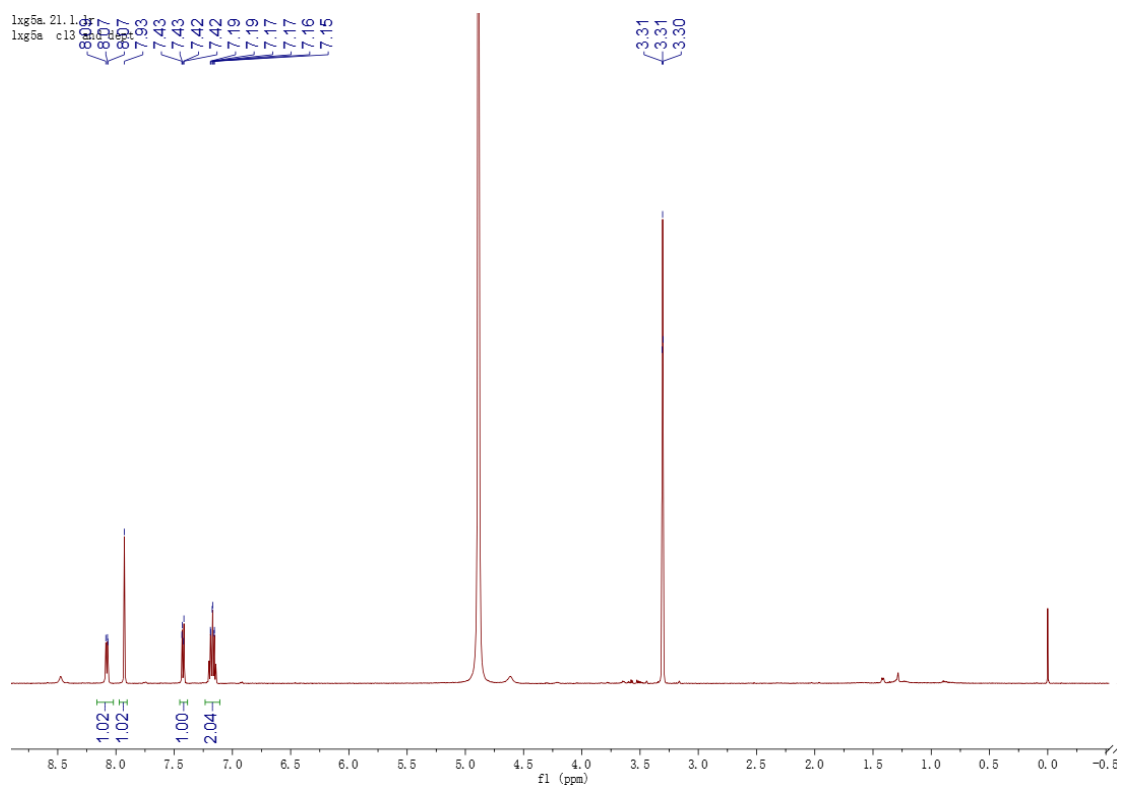

Figure S28. <sup>13</sup>C and DEPT NMR spectra of 6 (150 MHz, CD<sub>3</sub>OD)

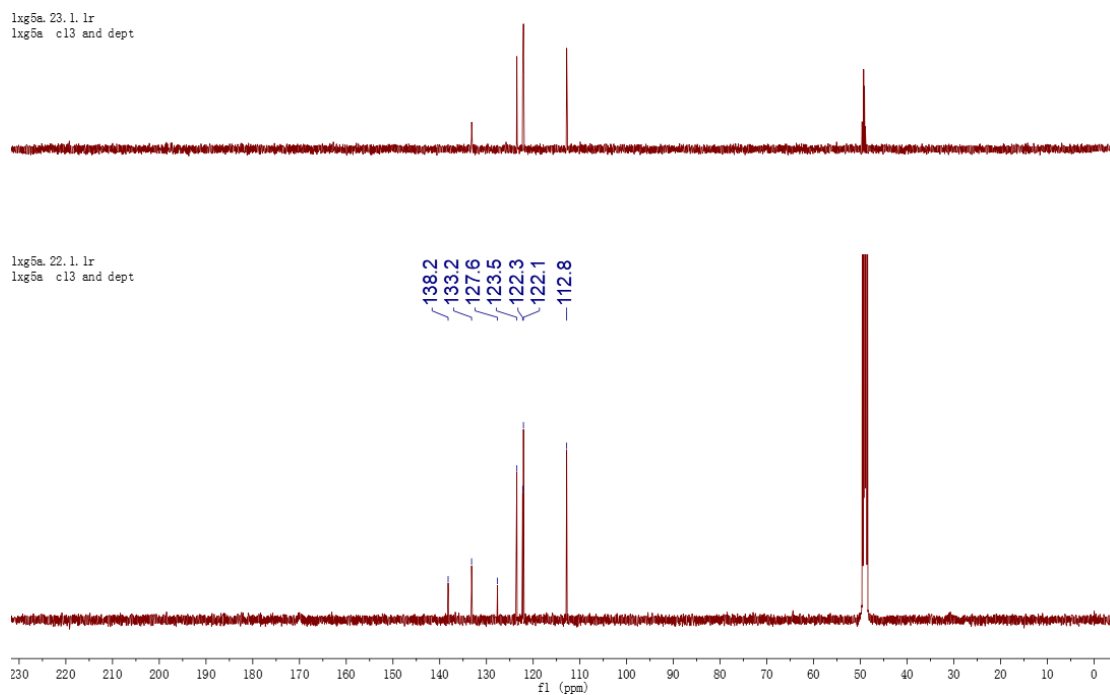

Figure S29. <sup>1</sup>H NMR spectrum of 7 (600 MHz, CD<sub>3</sub>OD)

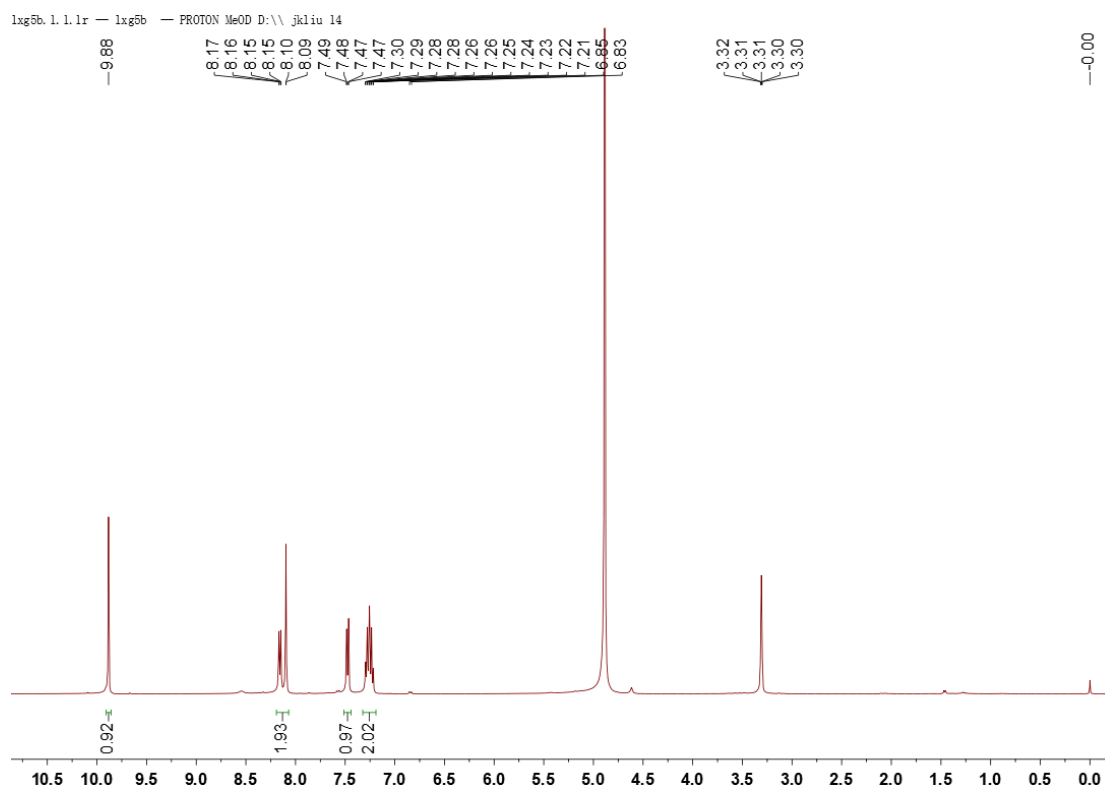

Figure S30. <sup>13</sup>C and DEPT NMR spectra of 7 (150 MHz, CD<sub>3</sub>OD)

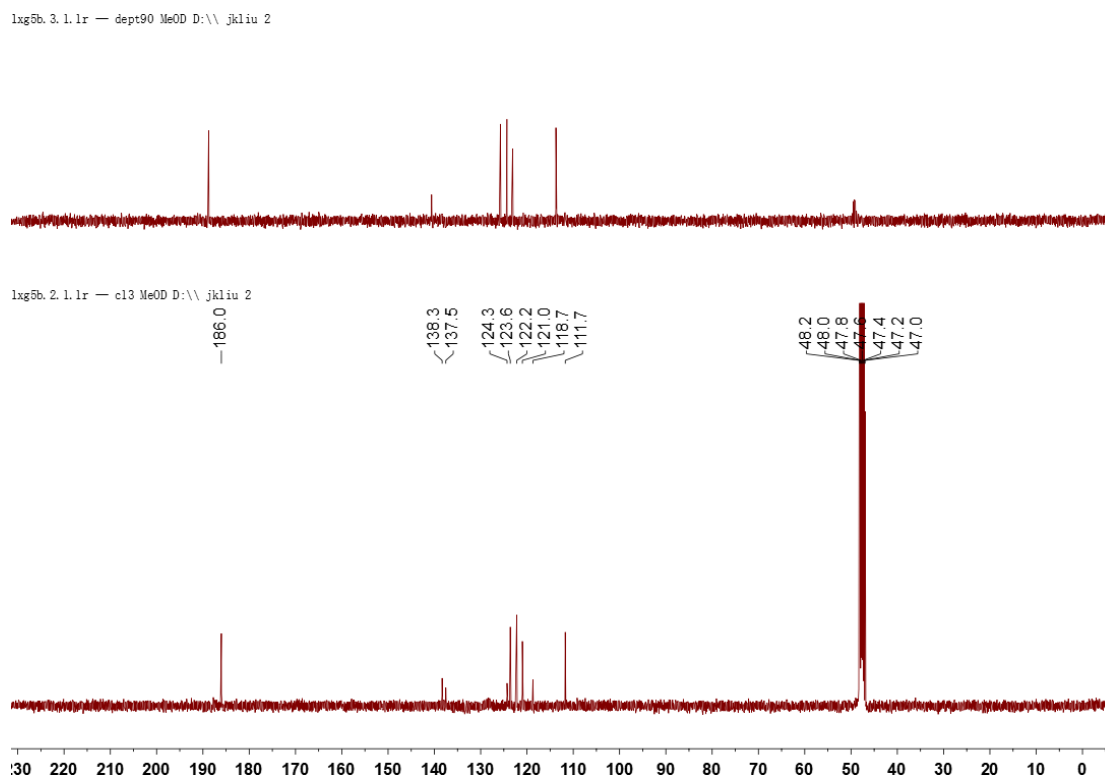

Figure S31. <sup>1</sup>H NMR spectrum of 8 (600 MHz, CD<sub>3</sub>OD)

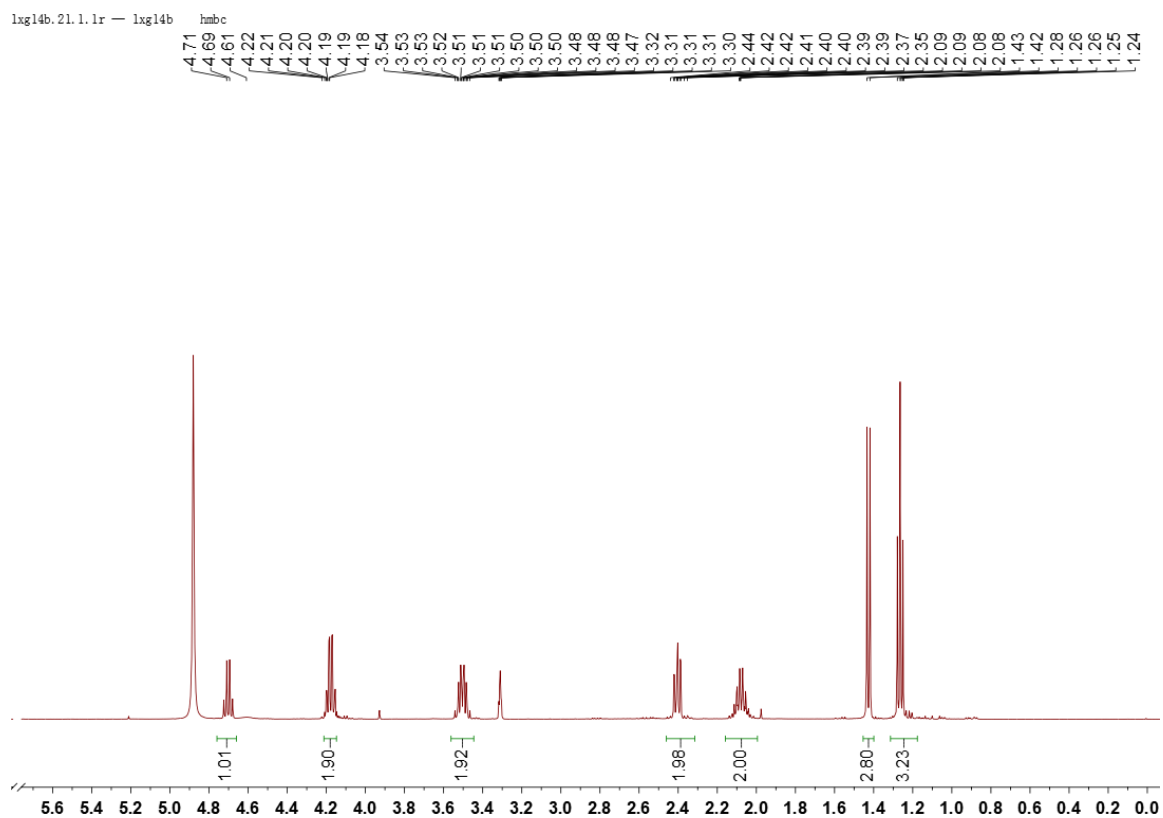

Figure S32. <sup>13</sup>C and DEPT NMR spectra of 8 (150 MHz, CD<sub>3</sub>OD)

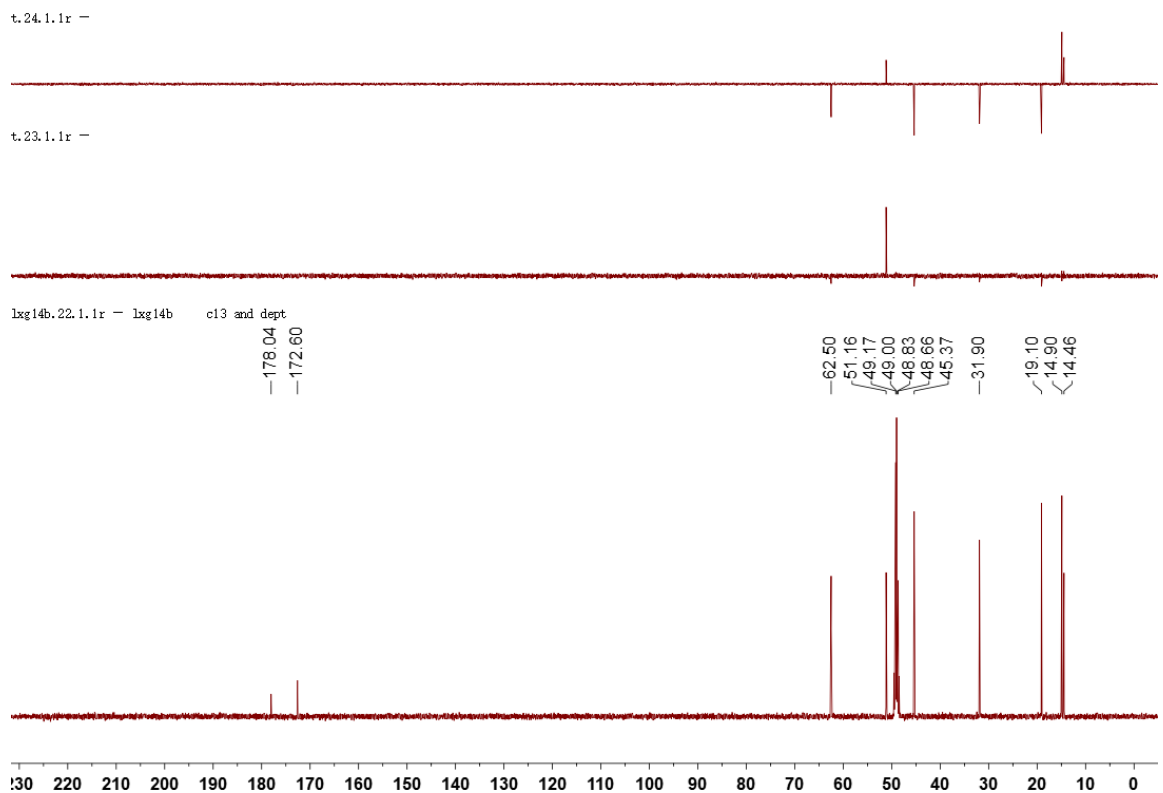

Figure S33. HSQC spectrum of 8

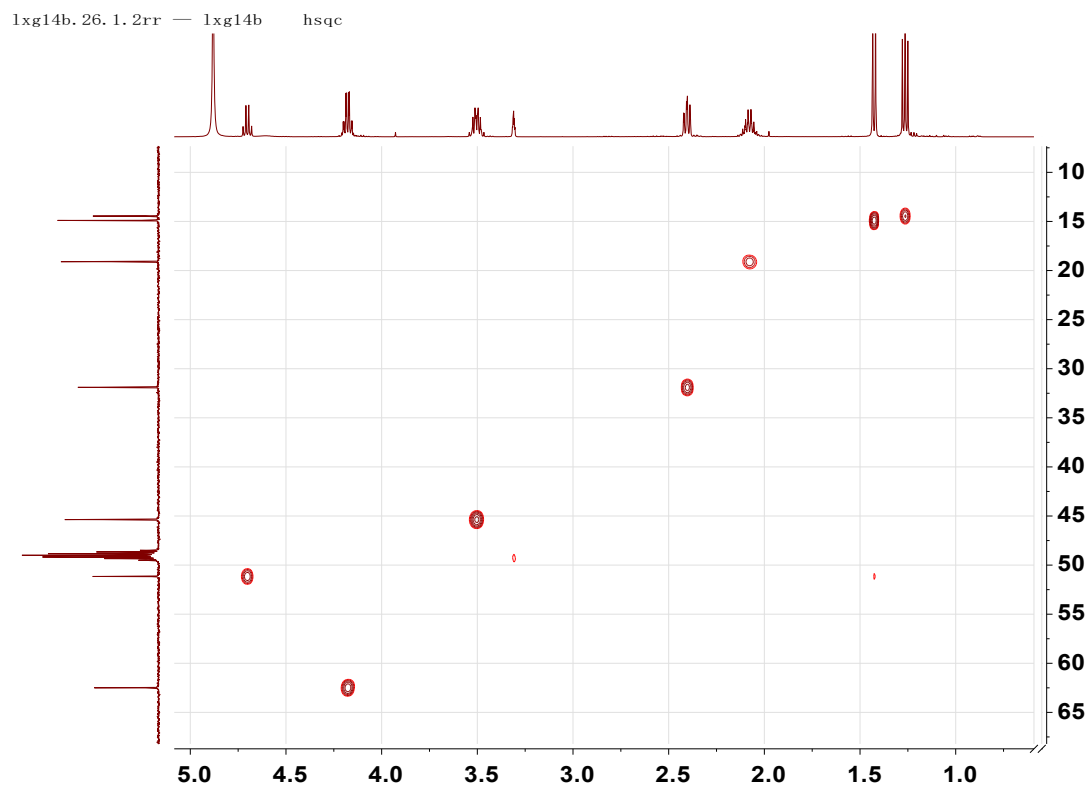

Figure S34. HMBC spectrum of 8

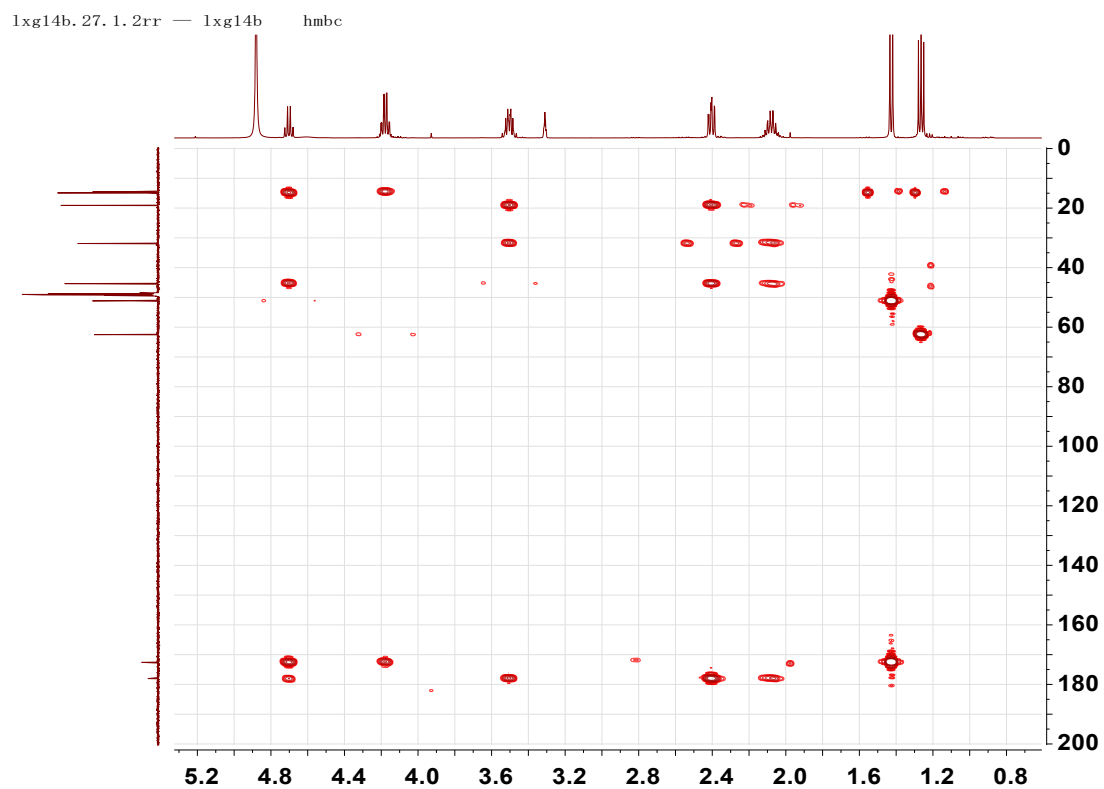



Figure S35. <sup>1</sup>H NMR spectrum of 9 (600 MHz, CD<sub>3</sub>OD)

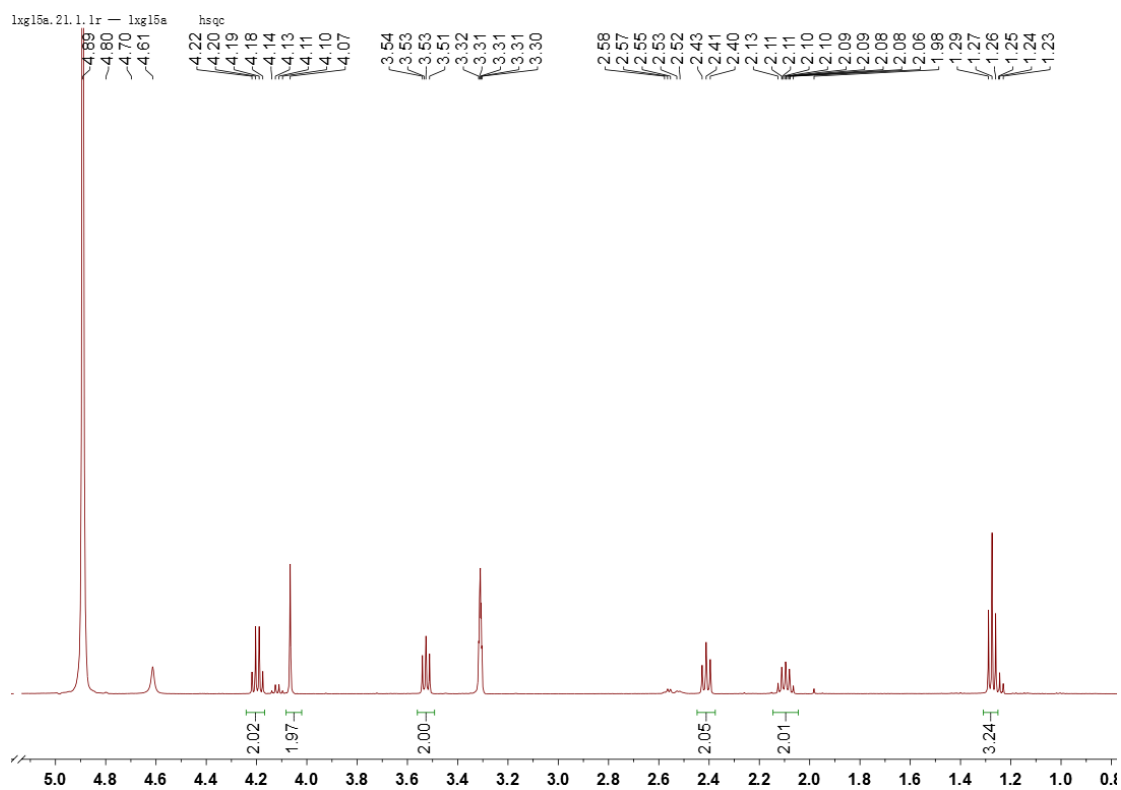

Figure S36. <sup>13</sup>C and DEPT NMR spectra of 9 (150 MHz, CD<sub>3</sub>OD)

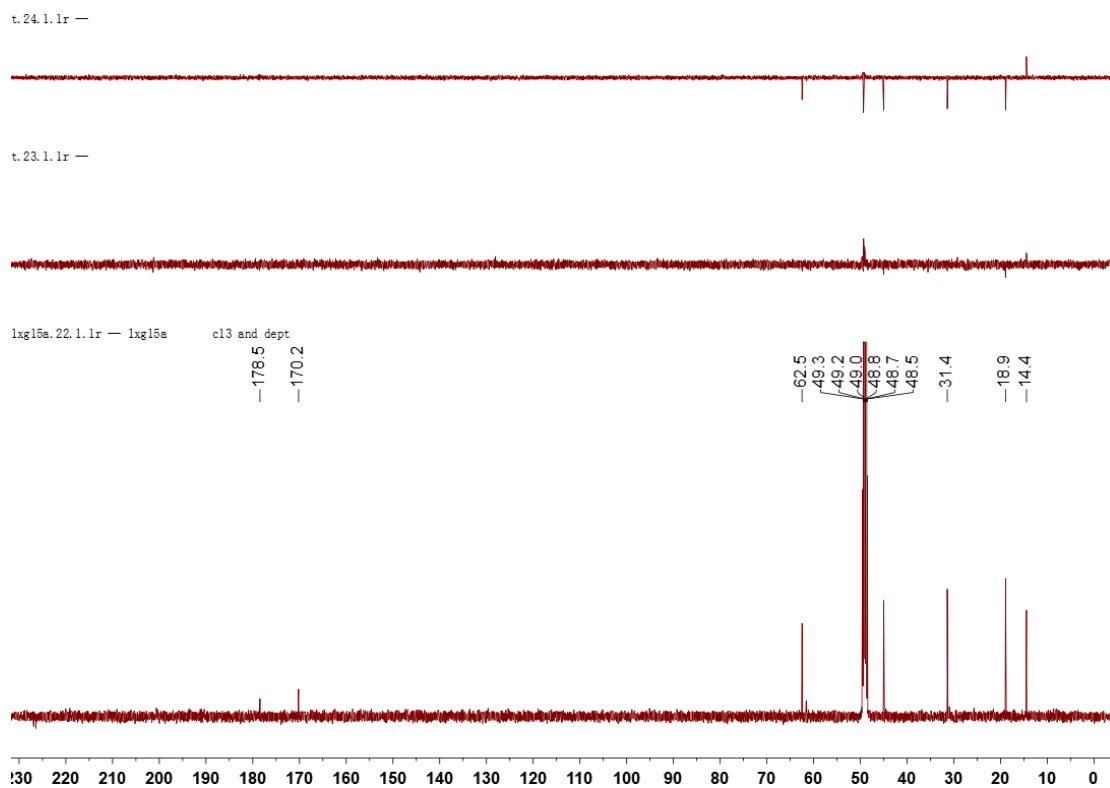

Figure S37. HSQC spectrum of 9

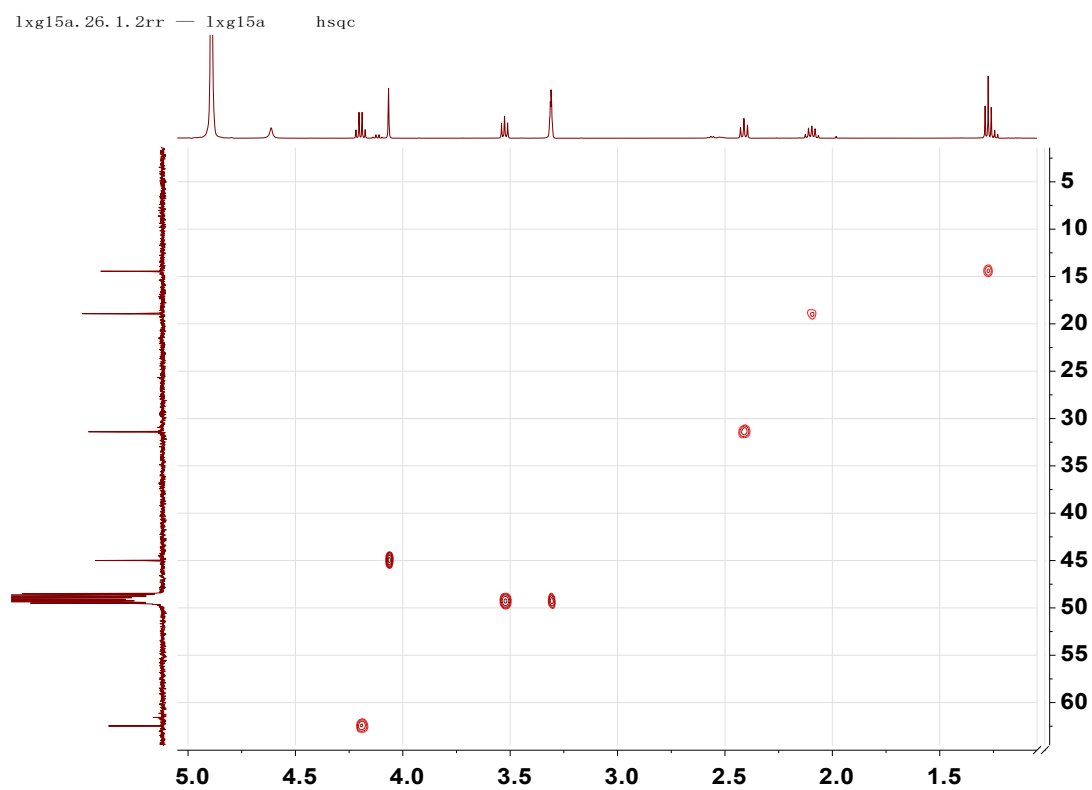

Figure S38. HMBC spectrum of 9

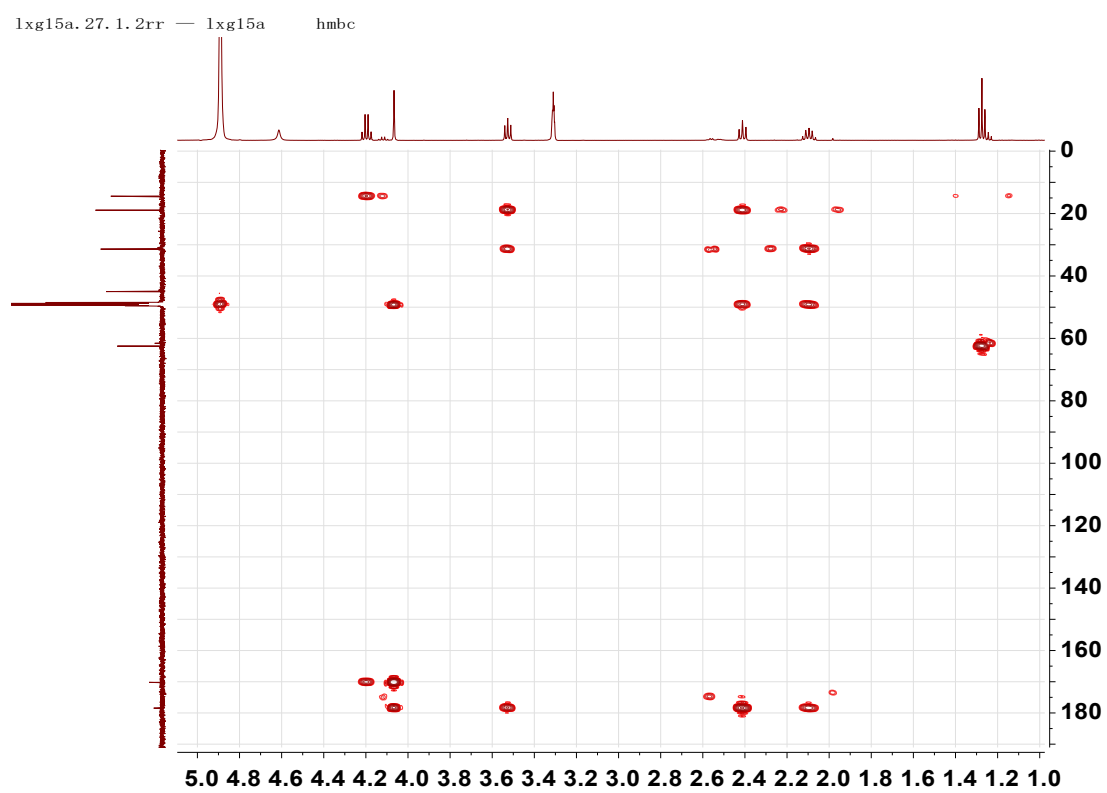

Supplement: d3ra02672h1.pdf [file d3ra02672h1.pdf]
